# Supplementary material for: RhNPs supported onN-functionalized mesoporous silica: effect on catalyst stabilization and catalytic activity
Source: Royal Society of Chemistry journal article supplement (doi:10.1039/d0dt04213g), 2021-01-01
Supplement: d0dt04213g1.pdf [file d0dt04213g1.pdf]

## Supporting information

### **RhNPs supported in N-functionalized mesoporous silica: effect on catalyst stabilization and catalytic activity**

*<sup>a</sup>Israel T. Pulido-Díaz, <sup>a</sup>Alejandro Serrano-Maldonado, Carlos Cesar López-Suárez, <sup>a</sup>Pedro A. Méndez-Ocampo, <sup>b</sup>Benjamín Portales-Martínez, <sup>c</sup>Aída Gutiérrez-Alejandre, <sup>a</sup>Karla P. Salas-Martin and Itzel Guerrero-Ríos<sup>a\*</sup>*

*<sup>a</sup>Depto. de Química Inorgánica y Nuclear, Facultad de Química, Universidad Nacional Autónoma de México. Av. Universidad 3000, 04510 CDMX, México*

*<sup>b</sup> CONACYT, Centro de Investigación en Ciencia Aplicada y Tecnología Avanzada, Laboratorio Nacional de Conversión y Almacenamiento de Energía, Instituto Politécnico Nacional, Calzada Legaría 694, Col. Irrigación, Ciudad de México, 11500, Mexico*

*<sup>c</sup> Depto de Ingeniería Química, Facultad de Química, Universidad Nacional Autónoma de México. Av. Universidad 3000, 04510 CDMX, México*

*\*Corresponding author, E-mail: itzelgr@unam.mx; Tel: +52 55 56223770*

# 1. NMR spectra of (EtO)<sub>3</sub>Si-(CH<sub>2</sub>)<sub>3</sub>-NAM

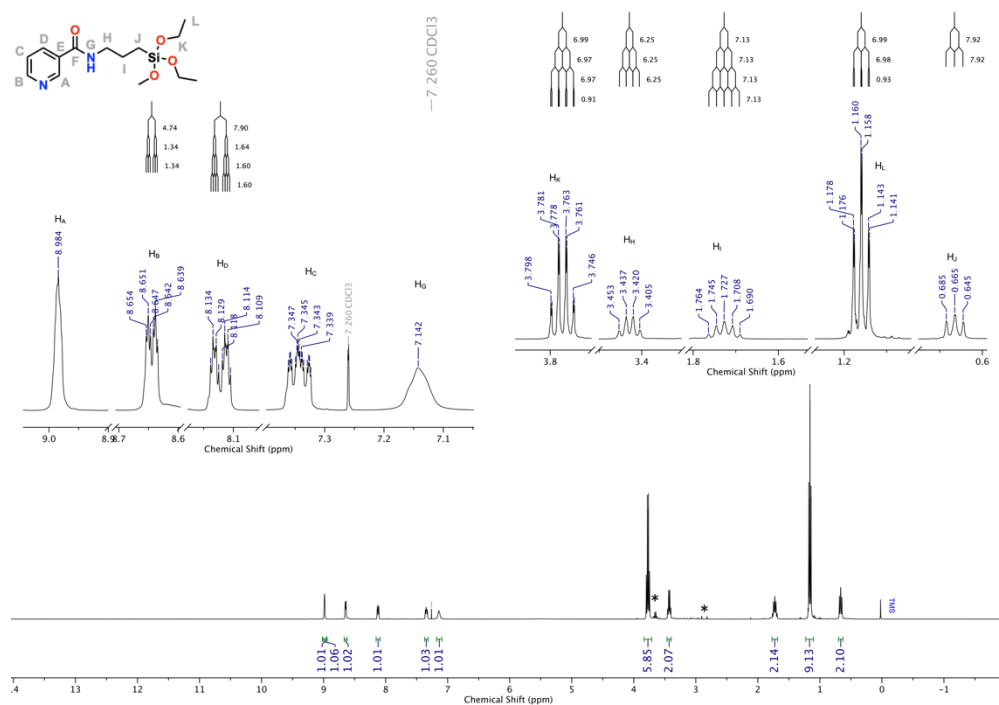

**Figure S1** <sup>1</sup>H-NMR spectra (400.13 MHz, r. t., CDCl<sub>3</sub>) of N-(3-(triethoxysilyl)propyl) nicotinamide (**NAM**) (\*) denotes residual triethylamine on sample.

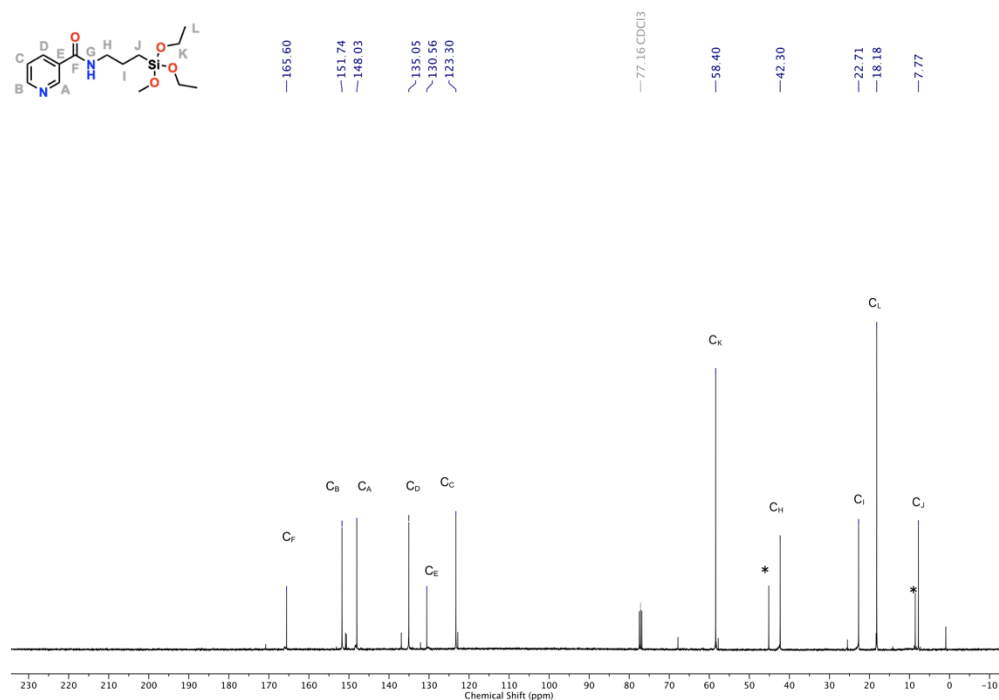

**Figure S2** <sup>13</sup>C{<sup>1</sup>H}-NMR spectra (100.61 MHz, r. t., CDCl<sub>3</sub>) of **NAM**. Asterisks (\*) denotes residual triethylamine on sample.

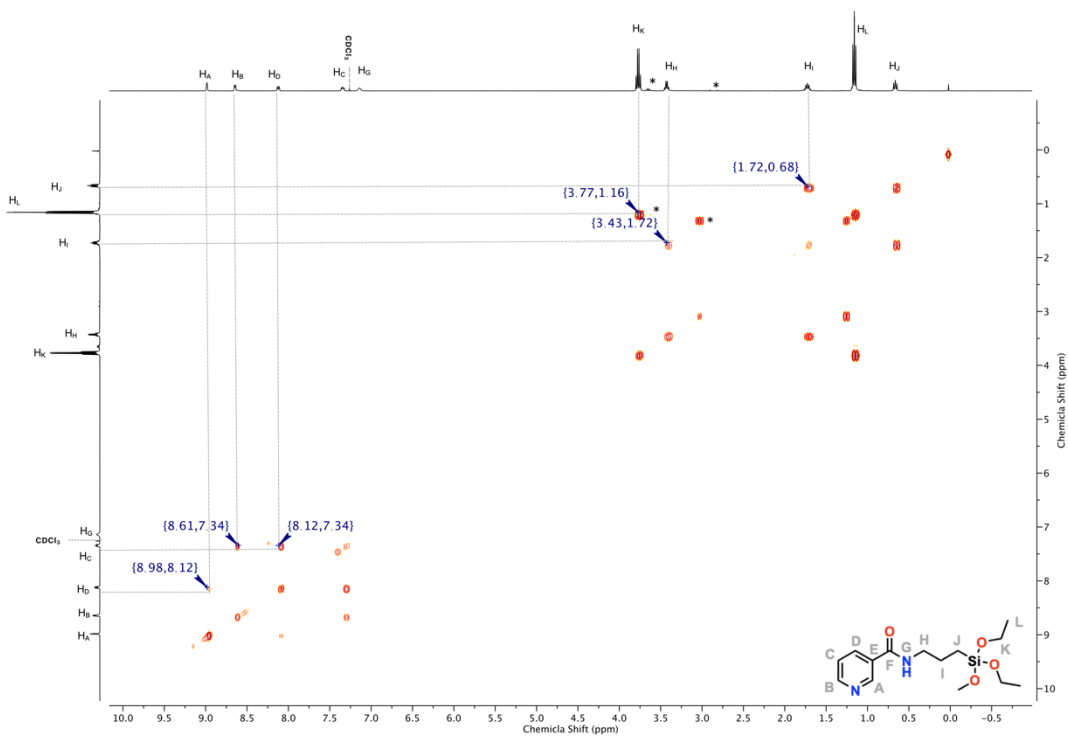

**Figure S3**  $\{^1\text{H}\}$  COSY-NMR spectra (400.13 MHz, r. t.,  $\text{CDCl}_3$ ) of **NAM**. Asterisks (\*) denotes residual triethylamine on sample.

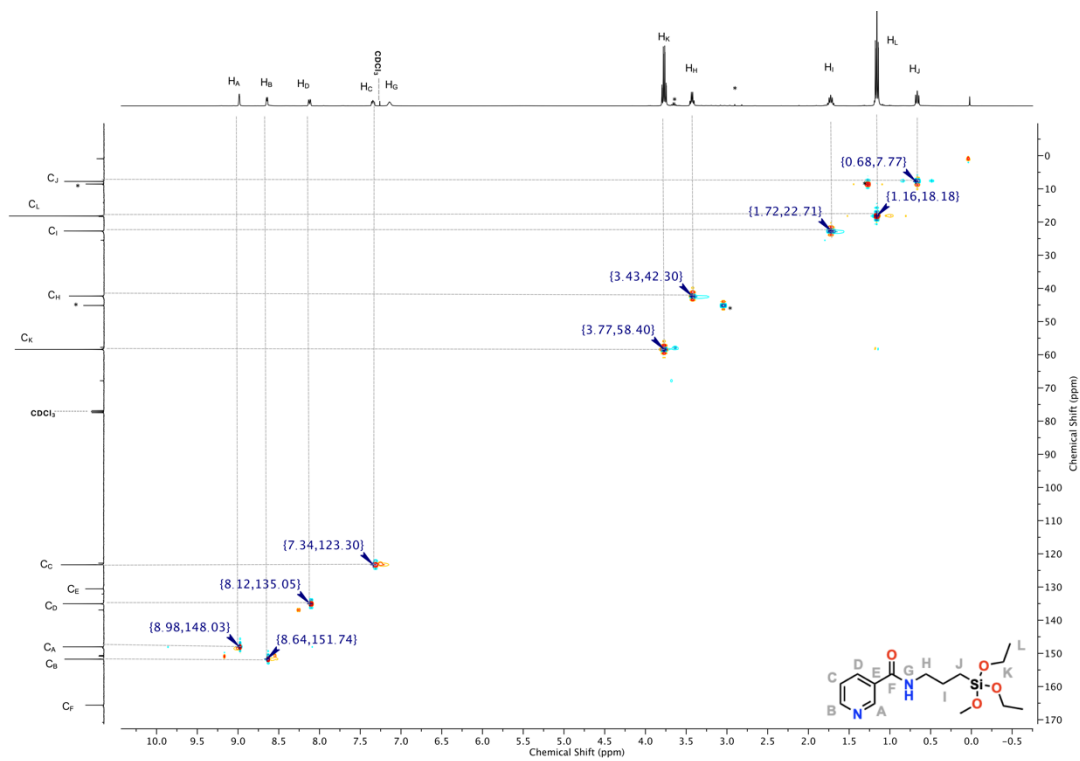

**Figure S4**  $\{^1\text{H}-^{13}\text{C}\}$  HSQC-NMR spectra (400.13 MHz, r. t.,  $\text{CDCl}_3$ ) of **NAM**. Asterisks (\*) denotes residual triethylamine on sample

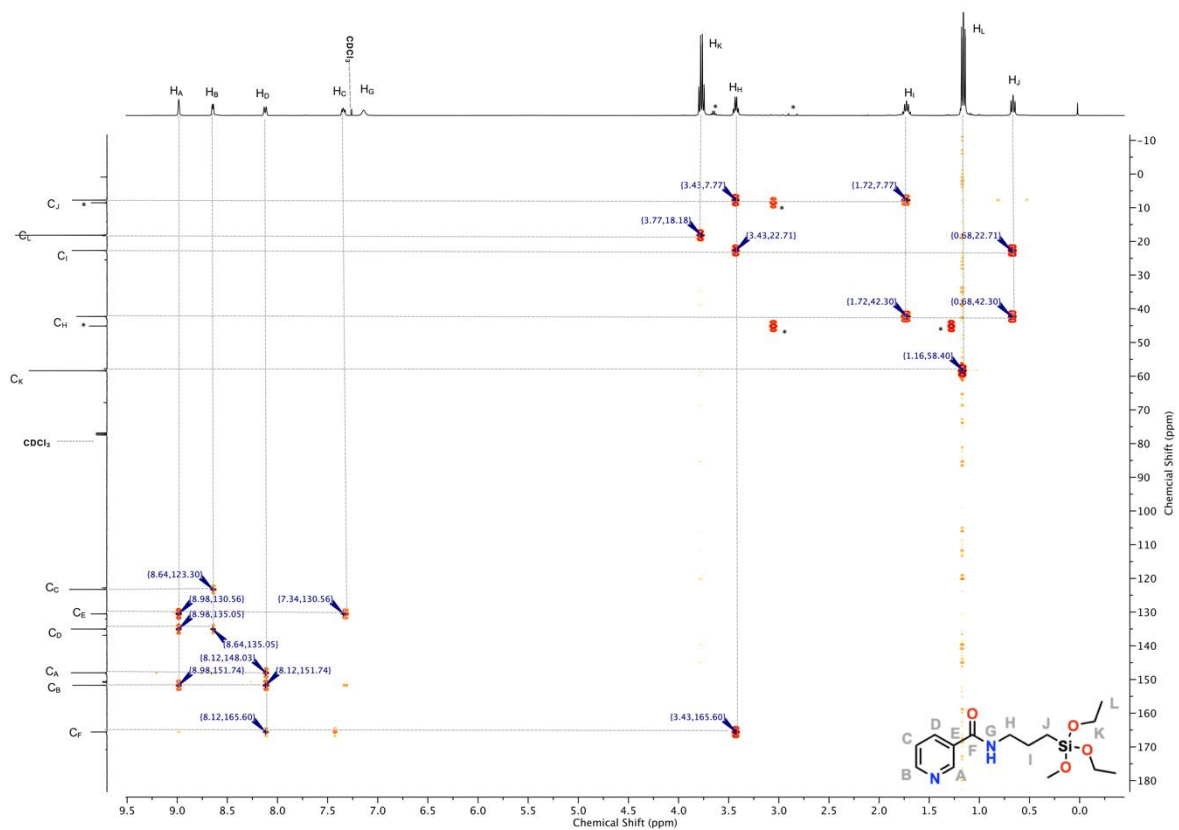

Figure S5  $\{^1\text{H}-^{13}\text{C}\}$  HMBC-NMR spectra (400.13 MHz, r. t.,  $\text{CDCl}_3$ ) of NAM. Asterisks (\*) denotes residual triethylamine on sample.

## 2. FT-IR spectra of supported RhNPs.

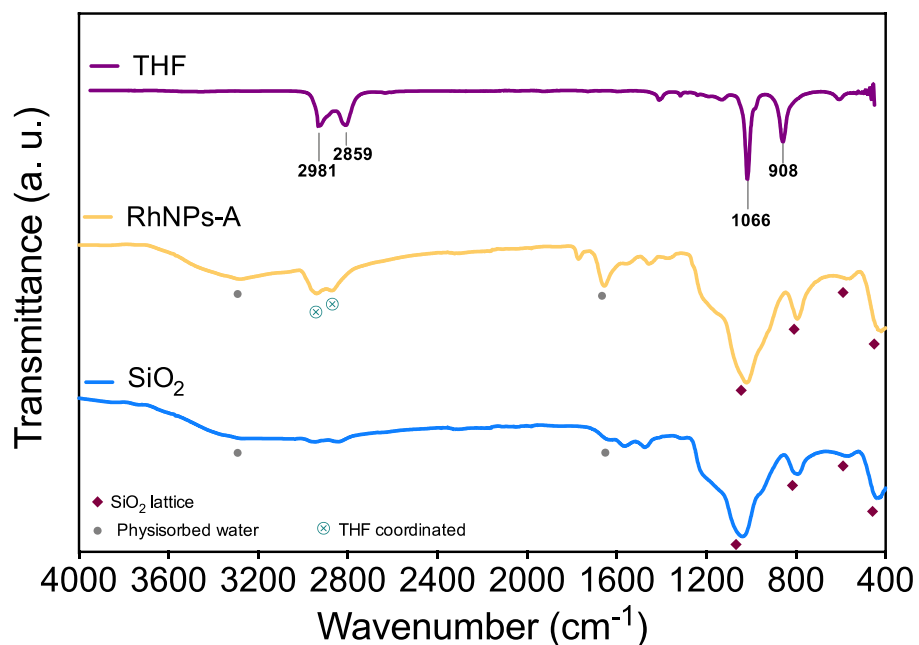

Figure S6- IR spectra of SiO<sub>2</sub>, RhNPs-A and THF.

Table S1 Characteristic absorption bands  $\nu$  (cm<sup>-1</sup>) in IR spectra of N-grafted silicas and supported RhNPs.

| Assignment                                          | SiO <sub>2</sub>       | RhNPs-A                | SiO <sub>2</sub> -APTES | RhNPs-B                | SiO <sub>2</sub> -NAM  | RhNPs-C                |
|-----------------------------------------------------|------------------------|------------------------|-------------------------|------------------------|------------------------|------------------------|
| $\nu$ (Si-O-H) and<br>$\nu$ (HO-H) <sub>phys.</sub> | 3275br<br>1642w        | 3277br<br>1655w        | 3295br<br>1635w         | 3273br<br>1652m        | 3298br<br>----         | 3296br<br>---          |
| $\nu$ (Si-O-Si)                                     | 1039s<br>947sh<br>788m | 1012s<br>932sh<br>791m | 1047s<br>965sh<br>795m  | 1043s<br>961sh<br>793m | 1046s<br>959sh<br>795m | 1051s<br>957sh<br>809m |
| $\delta$ (Si-O)                                     | 430m                   | 410m                   | 443m                    | 431m                   | 433m                   | 445m                   |
| $\nu$ (C-H)                                         | ---                    | ---                    | 2923m<br>2853m          | 2924m<br>2854m         | 2919m<br>2841m         | 2926m<br>2861m         |
| $\nu$ (C-N) <sub>amine</sub>                        | ---                    | ---                    | 1219sh                  | 1215sh                 | ---                    | ---                    |
| $\nu$ (N-H)                                         | ---                    | ---                    | 1477w                   | 1465w                  | 1475m                  | 1463m                  |
| $\delta$ (N-H)                                      | ---                    | ---                    | 1555w                   | 1561w                  | 1546m                  | 1541m                  |
| $\gamma$ (N-H) wagg                                 | ---                    | ---                    | 698vw                   | ---                    | 703vw                  | 699vw                  |
| $\nu$ (C=O)                                         | ---                    | ---                    | ---                     | ---                    | 1640s                  | 1648s                  |
| $\nu_{py}$ (C=C)                                    | ---                    | ---                    | ---                     | ---                    | 1193m                  | 1209m                  |
| $\nu_{py}$ (C-H)                                    | ---                    | ---                    | ---                     | ---                    | 3078w                  | 3091w                  |
| $\nu_{py}$ (C=N)                                    | ---                    | ---                    | ---                     | ---                    | 1427m                  | 1417m                  |

s (strong), br (broad), m (medium), w (weak), vw (very weak), sh (shoulder), py (pyridine)

### 3. XPS analysis of RhNPs

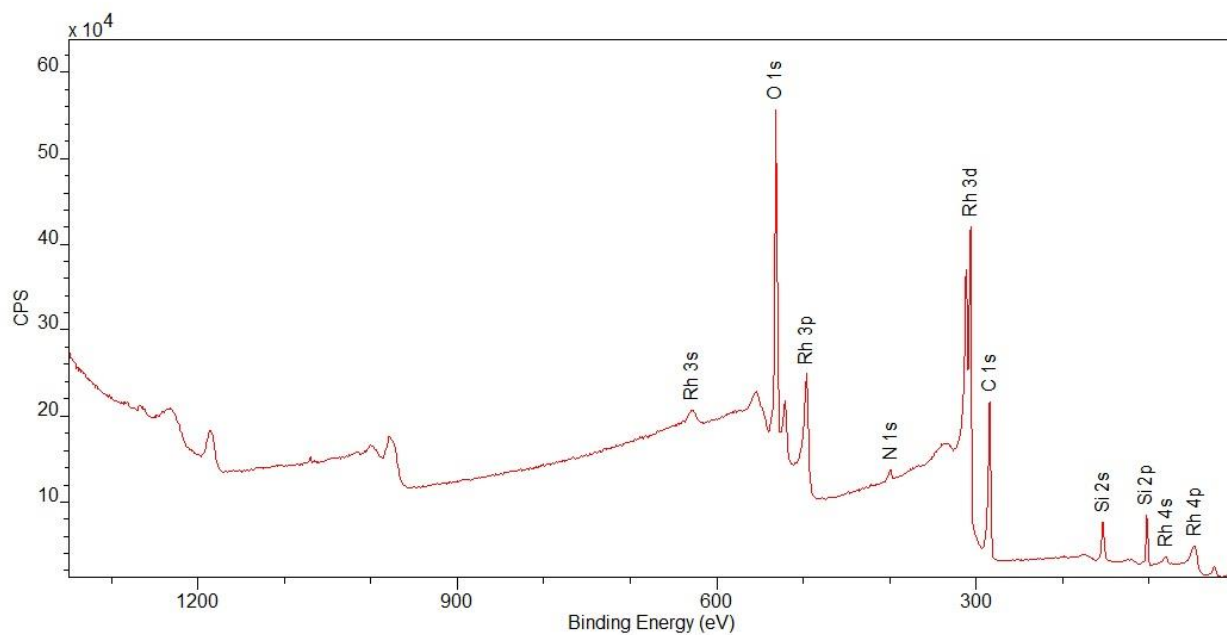

Figure S7 XPS survey of RhNPs-B.

Table S2 Element distribution on surface of RhNPs-B by XPS.

| Element | Atomic % | Weight % |
|---------|----------|----------|
| C 1s    | 40.3     | 19.8     |
| N 1s    | 1.5      | 0.8      |
| O 1s    | 36.7     | 24.1     |
| Si 2p   | 11.5     | 13.2     |
| Rh 3d   | 10.0     | 42.1     |

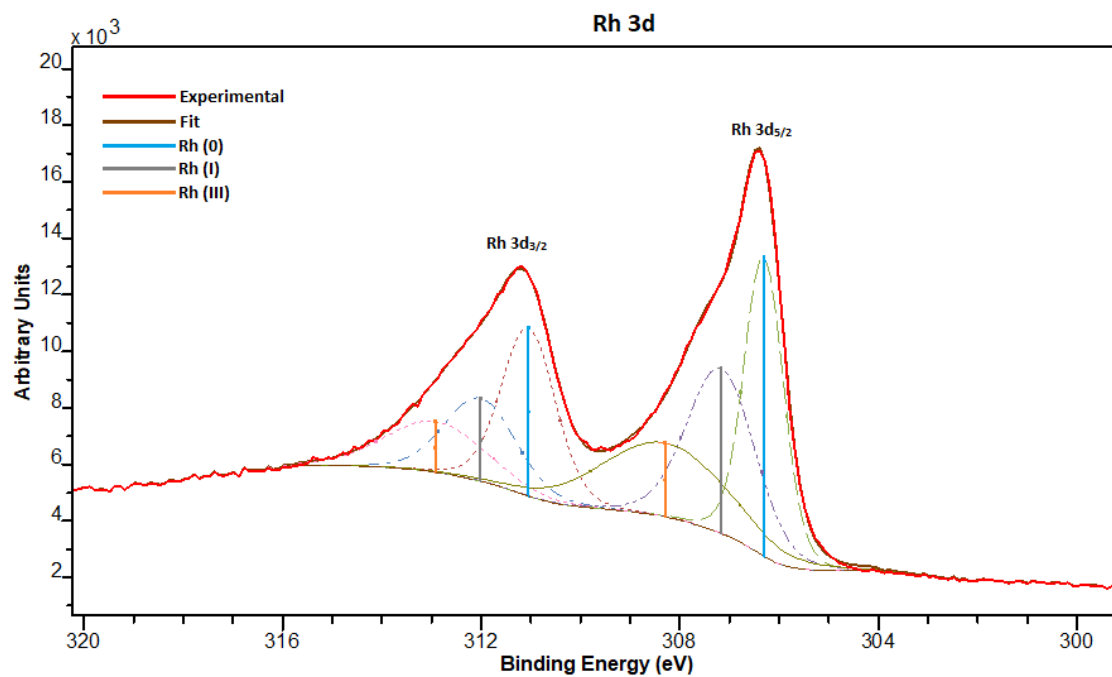

Figure S8 High resolution-XPS Rh 3d of RhNPs-B.

Table S3 Rhodium species distribution on surface of RhNPs-B by XPS.

|          | Rh 3d (BE, eV) |        | Area %<br>(3d <sub>5/2</sub> ) |
|----------|----------------|--------|--------------------------------|
|          | 3/2            | 5/2    |                                |
| Rh (0)   | 311.05         | 306.31 | 36.4                           |
| Rh (I)   | 312.01         | 307.17 | 34.7                           |
| Rh (III) | 312.93         | 308.29 | 28.9                           |

Residual STD = 1.07199

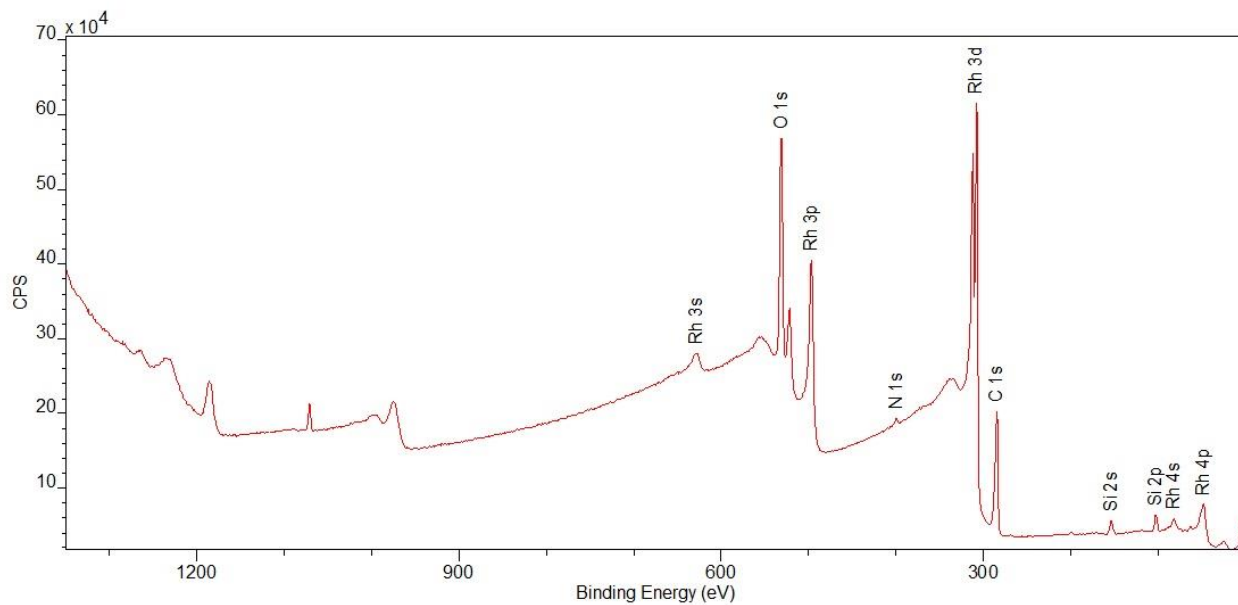

**Figure S9** XPS survey of RhNPs-C.

**Table S4** Element distribution on surface of RhNPs-C by XPS.

| Element | Atomic % | Weight % |
|---------|----------|----------|
| C 1s    | 39.0     | 16.1     |
| N 1s    | 0.9      | 0.5      |
| O 1s    | 40.6     | 22.5     |
| Si 2p   | 5.6      | 5.1      |
| Rh 3d   | 13.9     | 55.8     |



#### 4. Thermal decomposition data of synthesized materials

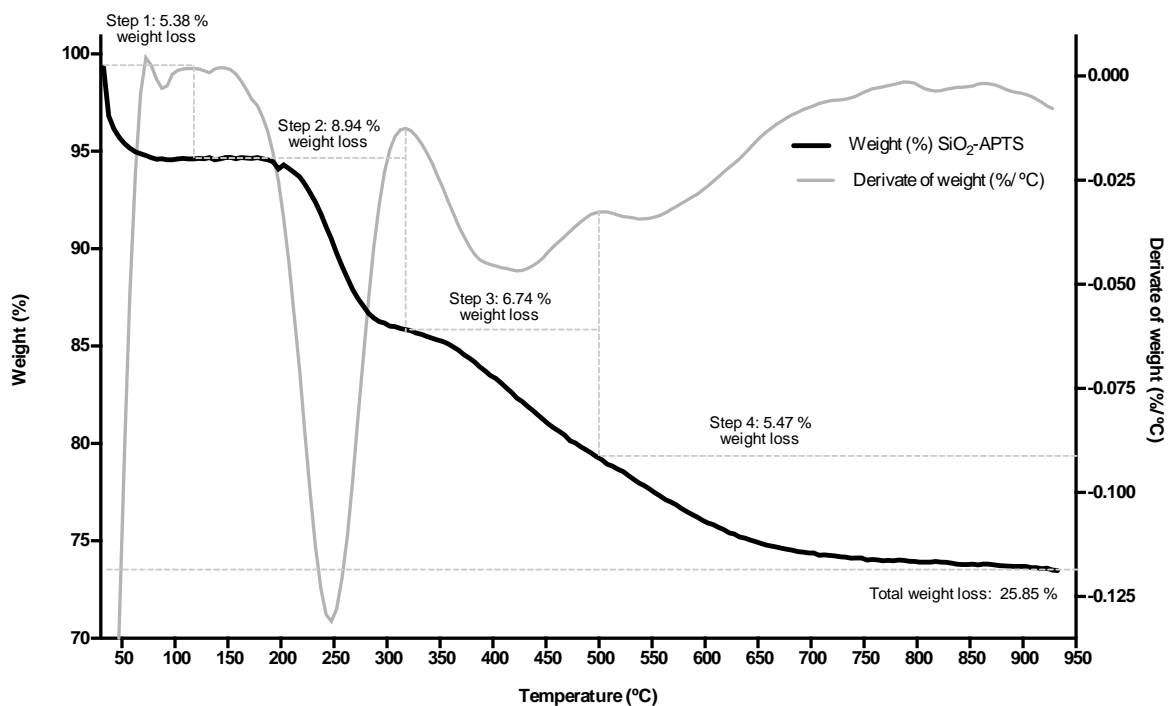

Figure S10 Thermal decomposition data of  $\text{SiO}_2\text{-APTES}$  run in air at heating rate of 1 °C/min.

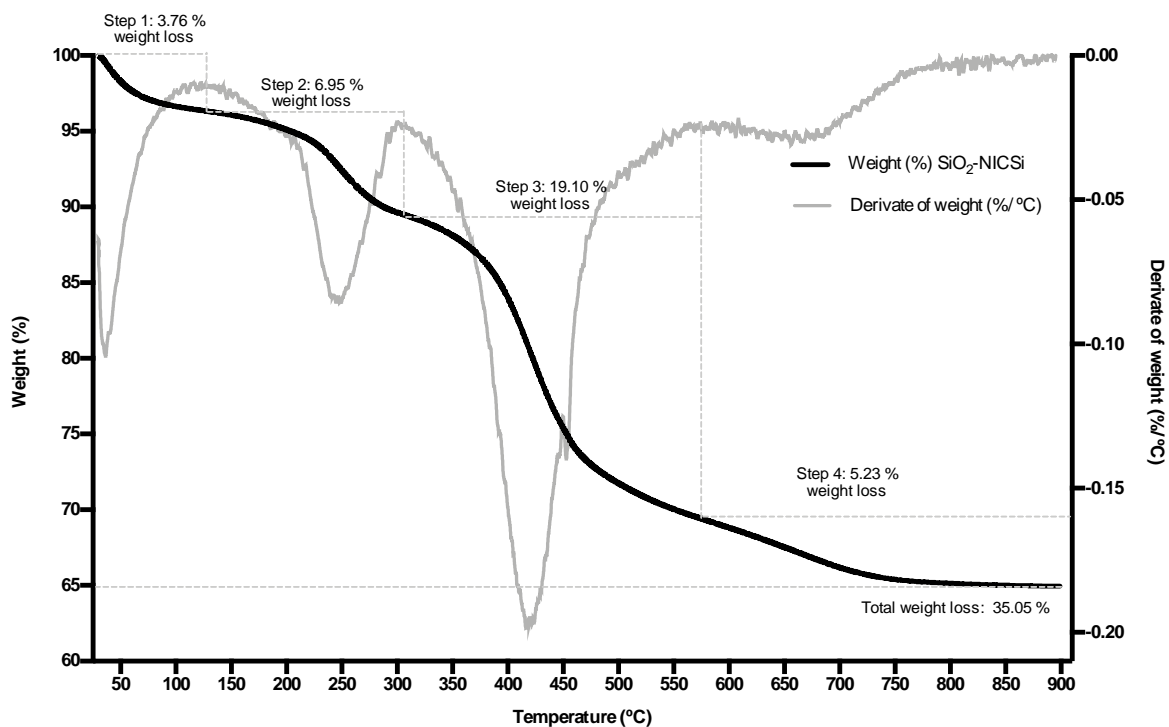

Figure S11 Thermal decomposition data of  $\text{SiO}_2\text{-(CH}_2\text{)}_3\text{-NAM}$  run in air at heating rate of 5 °C/min.

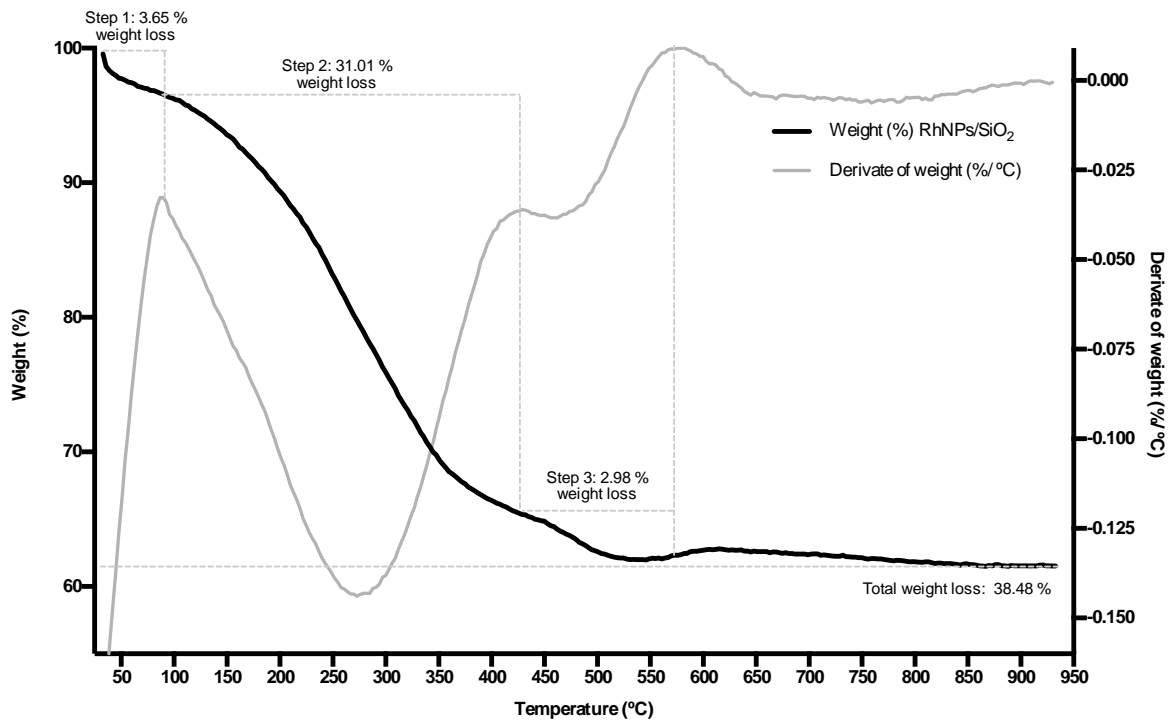

Figure S12 Thermal decomposition data of RhNPs-A run in air at a heating rate of 1 °C/min.

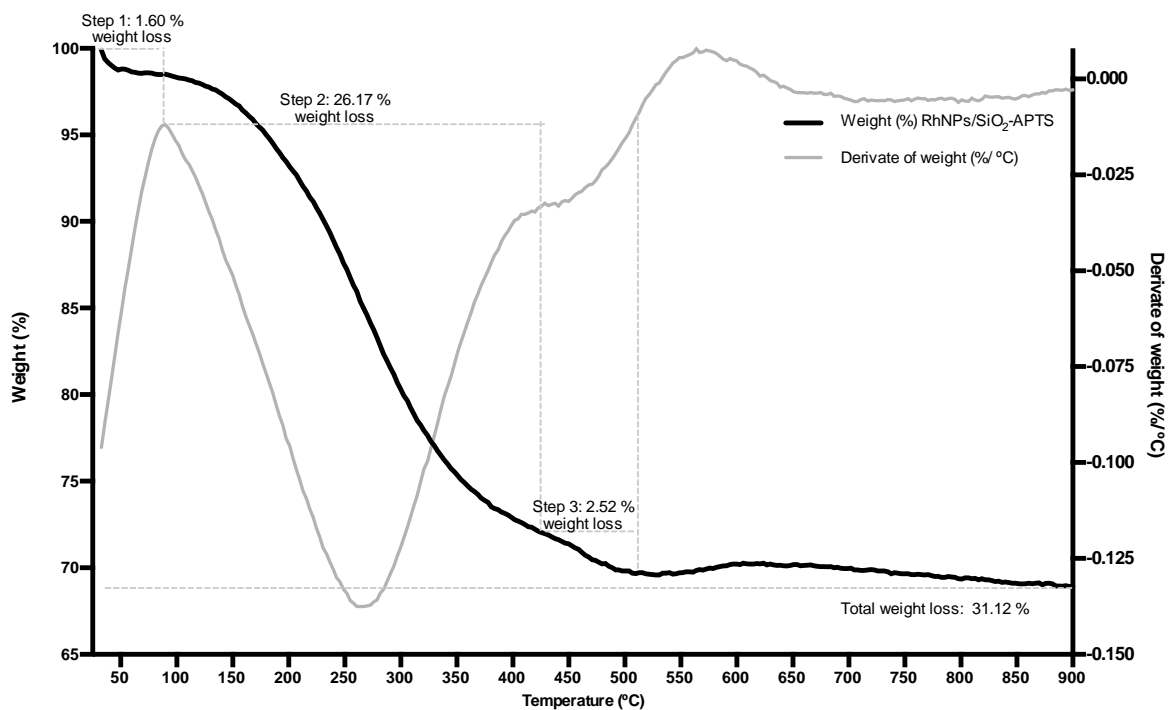

Figure S13 Thermal decomposition data of RhNPs-B run in air at a heating rate of 1 °C/min.

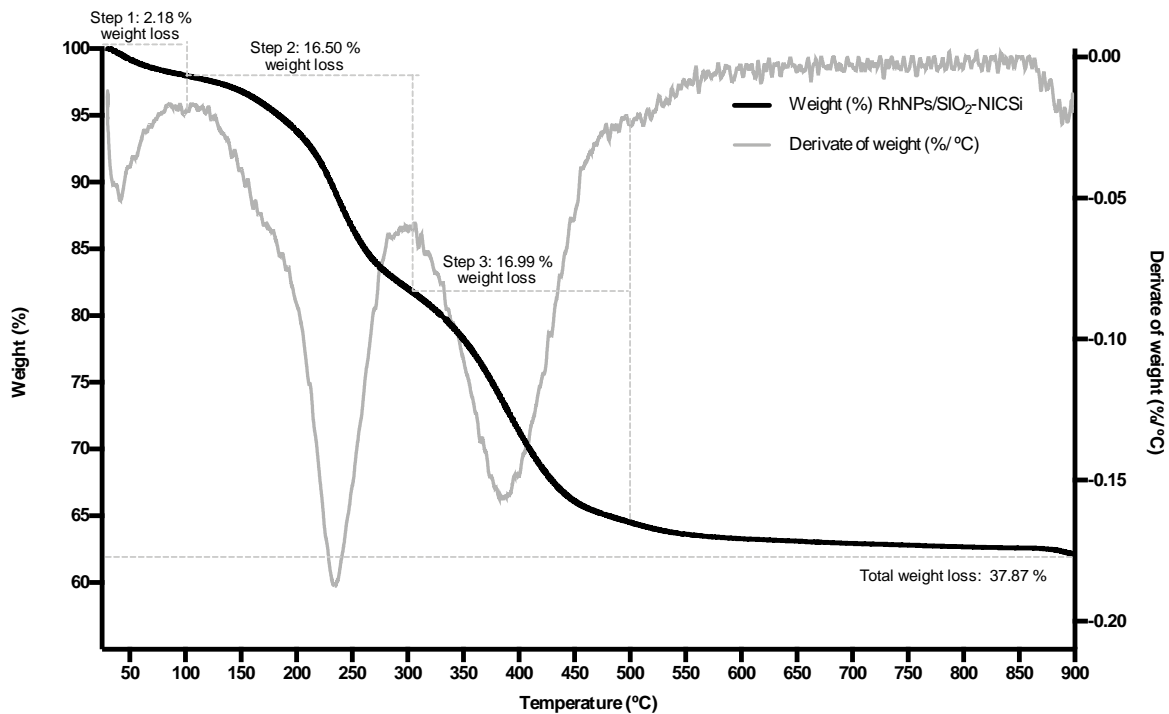

Figure S14 Thermal decomposition data of RhNPs-C run in air at heating rate of 5 °C/min.

## 5. SEM images and particle distribution.

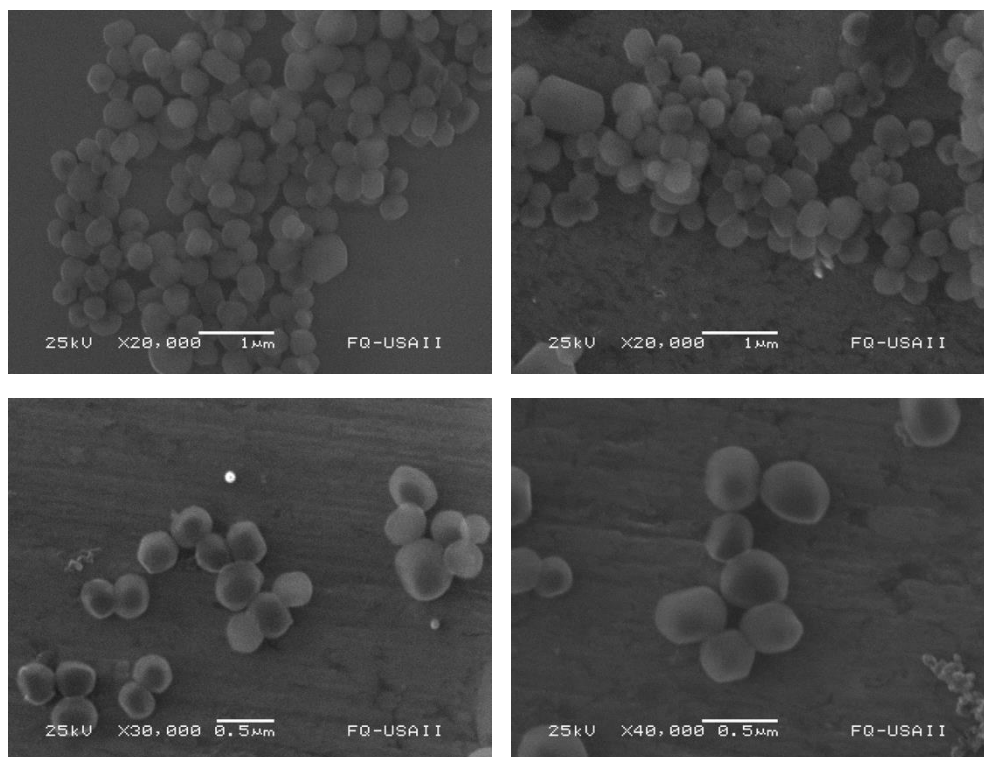

Figure S15 SEM images of functionalized silica  $\text{SiO}_2\text{-APTES}$ .

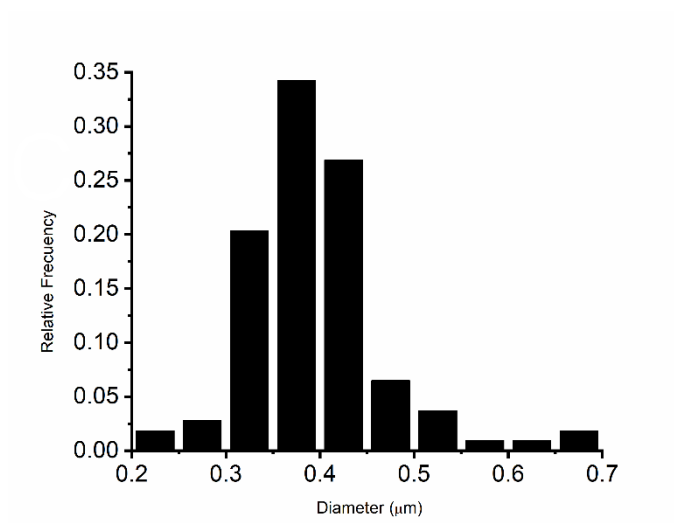

Figure S16 Histogram of the  $\text{SiO}_2\text{-APTES}$  particle size distribution. Mean diameter =  $393 \pm 74$  nm (for 108 particles)

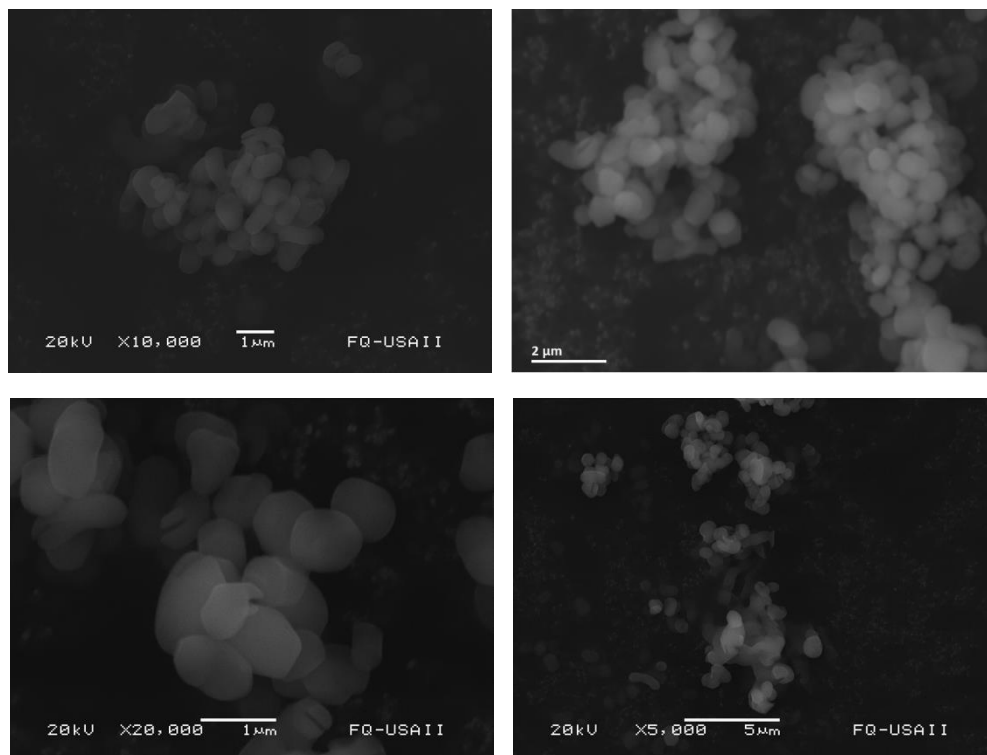

**Figure S17** SEM images of functionalized silica  $\text{SiO}_2\text{-(CH}_2\text{)}_3\text{-NAM}$ .

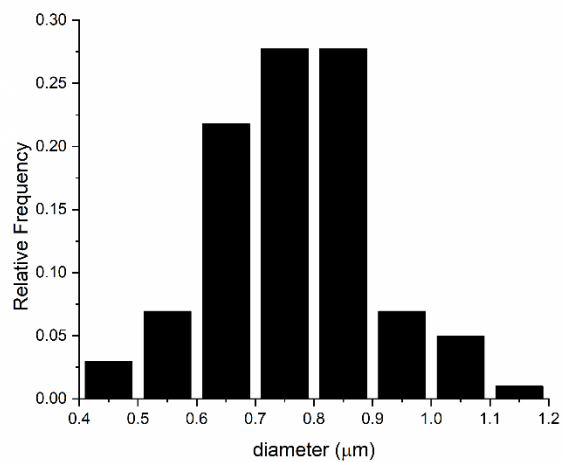

**Figure S18** Histogram of the  $\text{SiO}_2\text{-(CH}_2\text{)}_3\text{-NAM}$  particle size distribution. Mean diameter =  $767 \pm 137$  nm (for 101 particles)

## 6. TEM images and EDX analysis

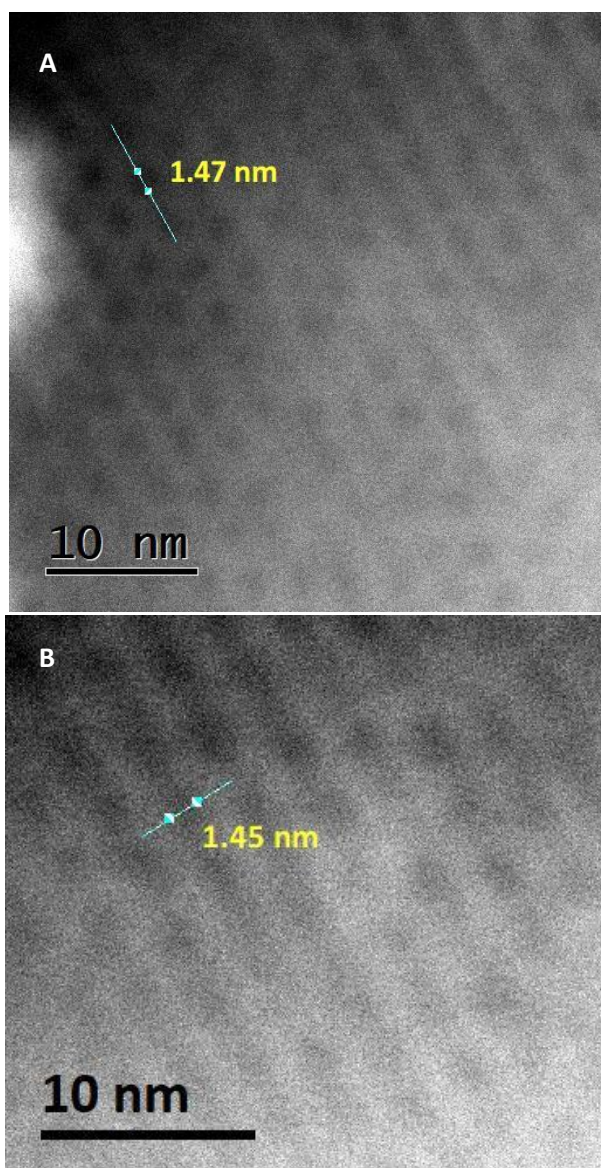

**Figure S19** HAADF-STEM images of pristine  $\text{SiO}_2$  and FFT of **A-B** (Pore size measured determined by FFT = 1.4 nm).

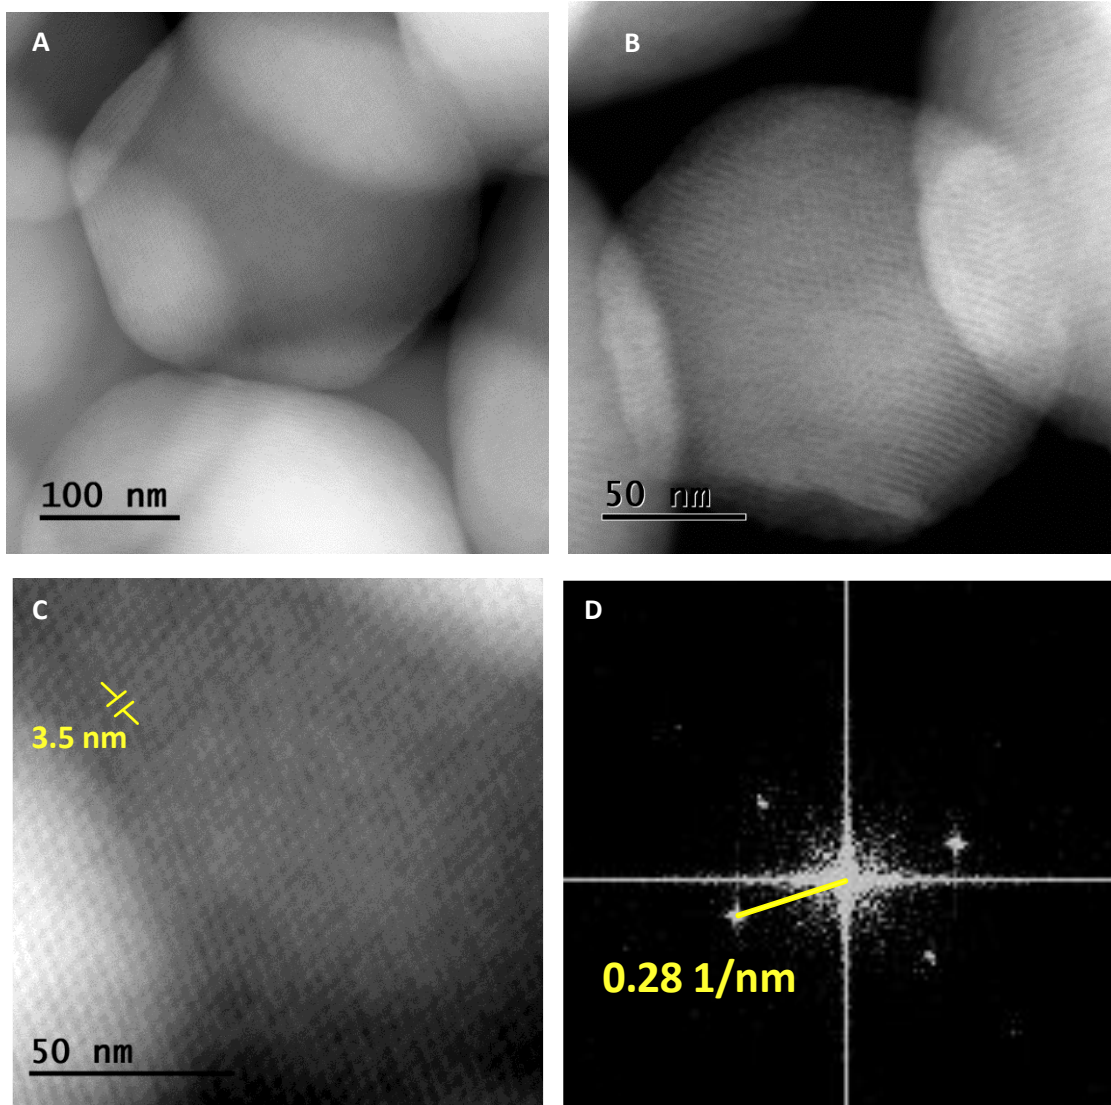

**Figure S20** HAADF-STEM images of  $\text{SiO}_2$ -APTES (A-C) and FFT of C. (Pore size measured determined by FFT = 3.5 nm).

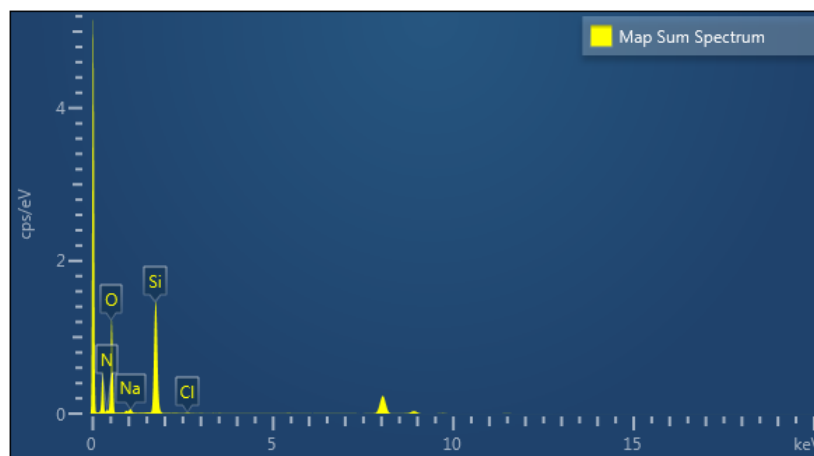

**Figure S21** EDX element quantification of  $\text{SiO}_2$ -APTES.



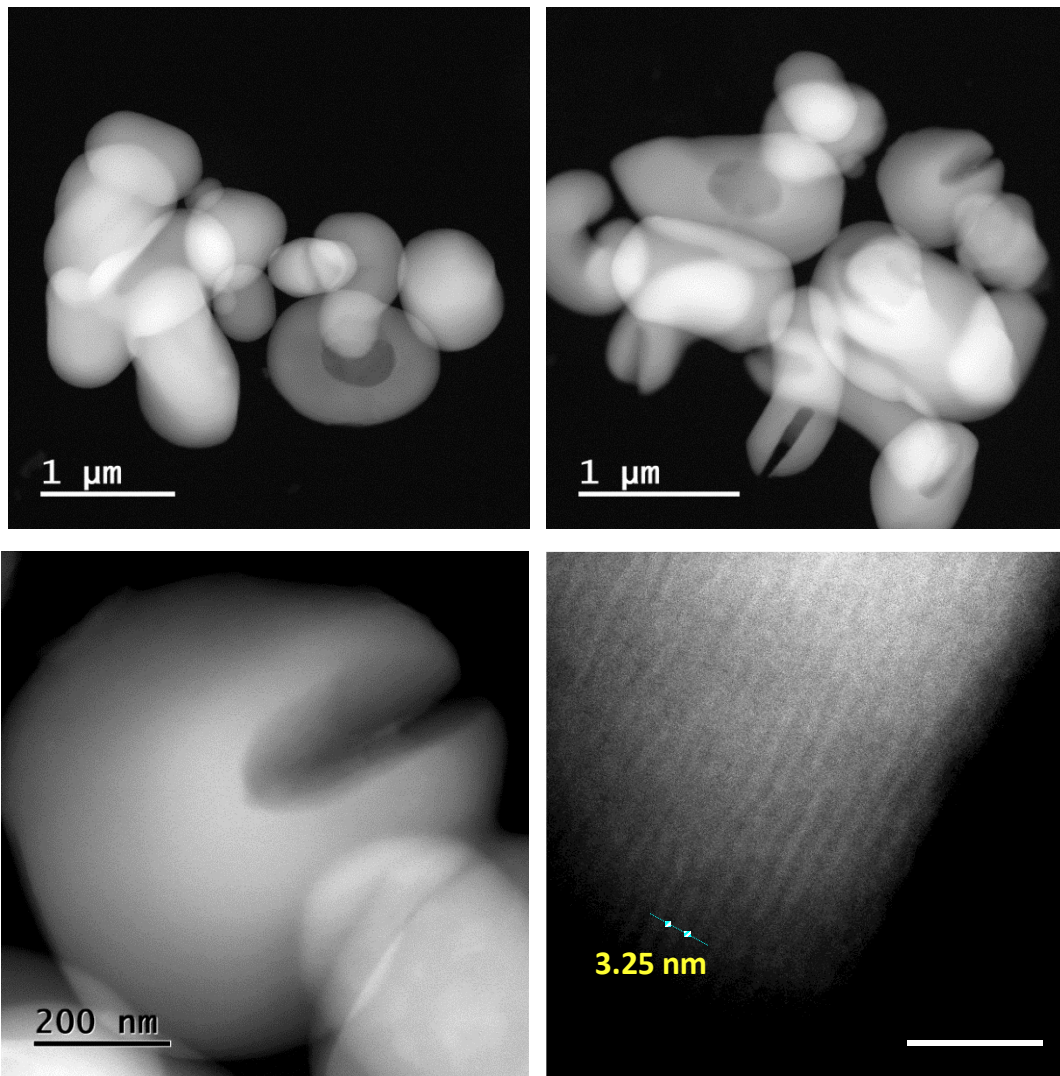

**Figure S22** HAADF-STEM images of  $\text{SiO}_2\text{-(CH}_2\text{)}_3\text{-NAM}$ . (Pore size determined by HAADF-STEM = 3.3 nm)

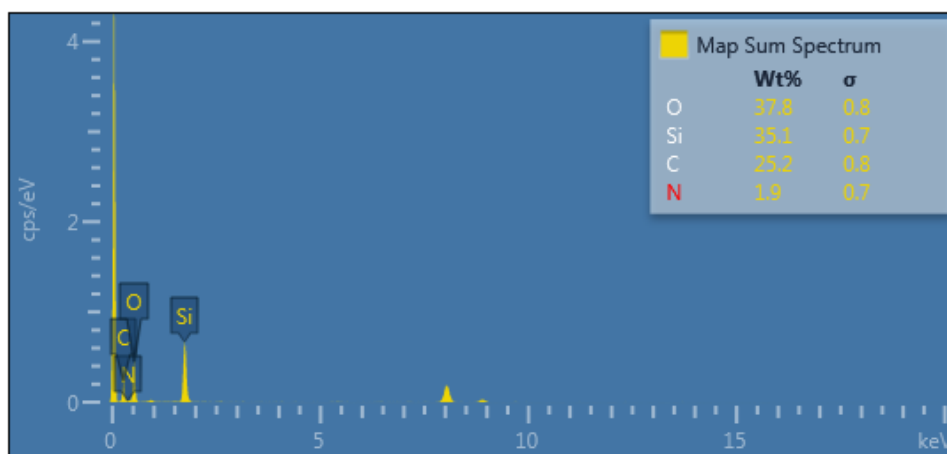

**Figure S23** EDX element quantification of  $\text{SiO}_2\text{-(CH}_2\text{)}_3\text{-NAM}$ .



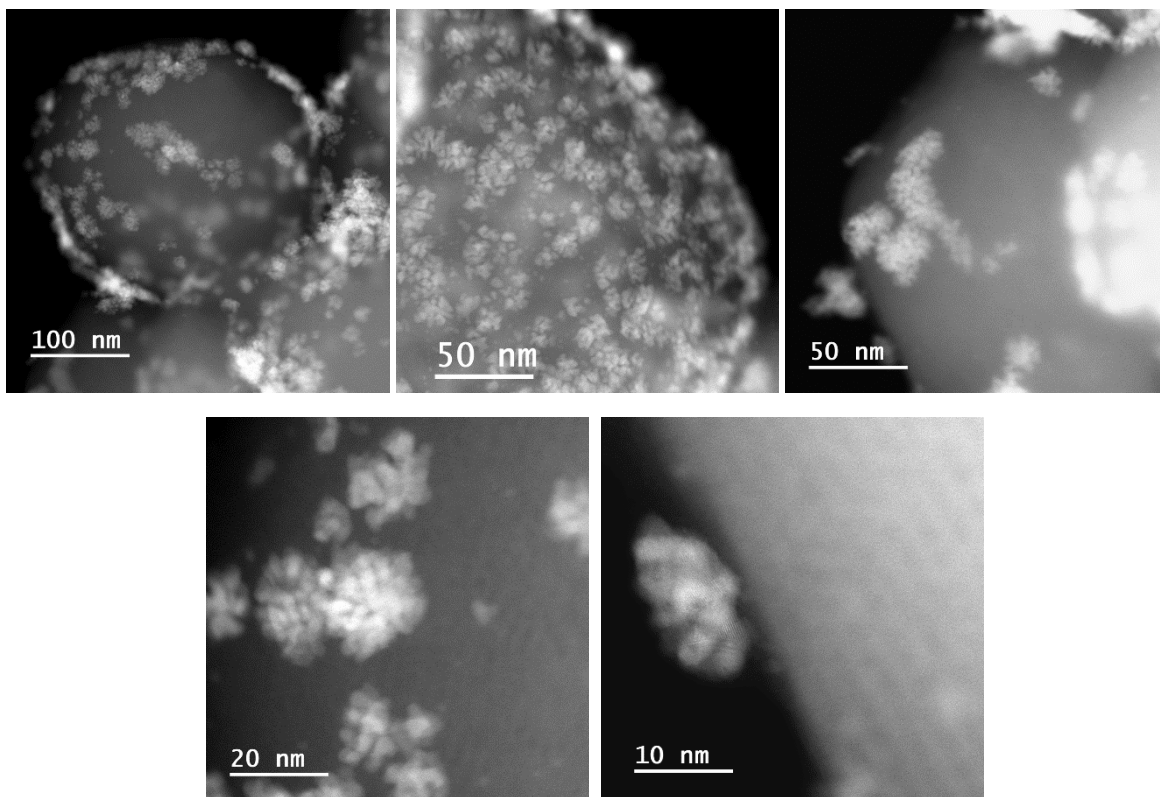

**Figure S24** HAADF-STEM images of RhNPs-A. (no functionalization)

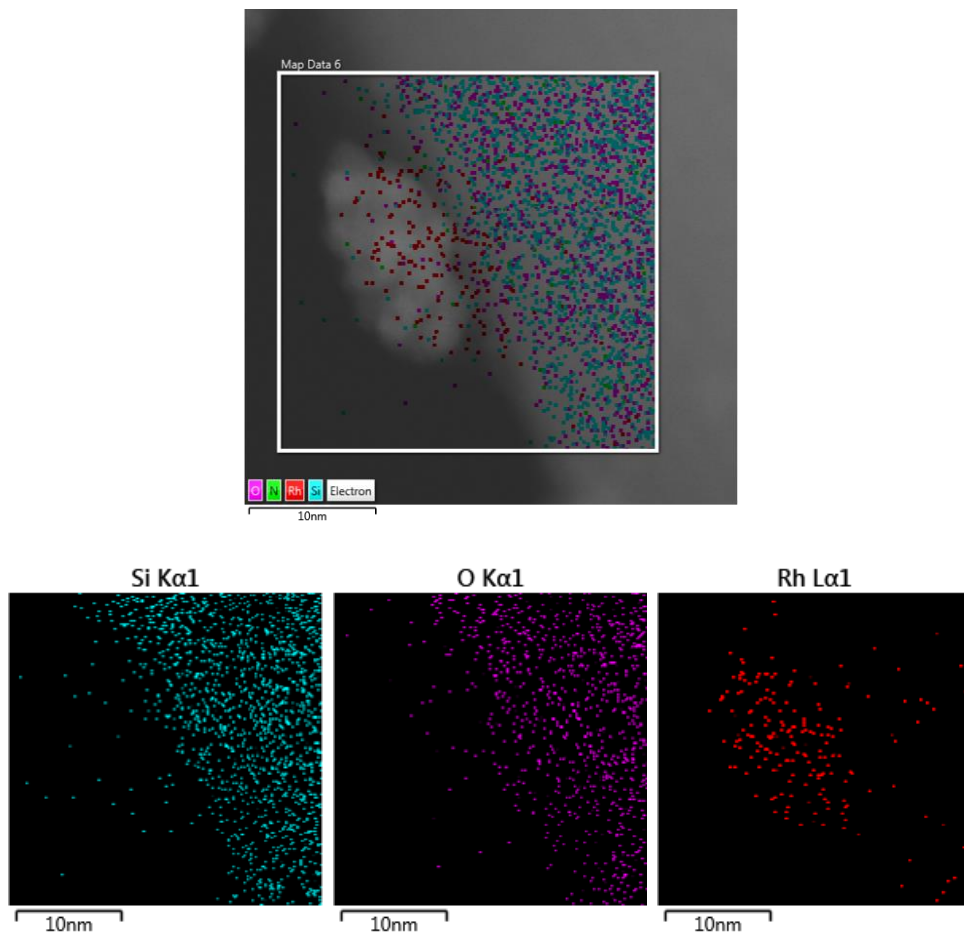

**Figure S25** EDX element mapping images of RhNPs-A. (no functionalization)

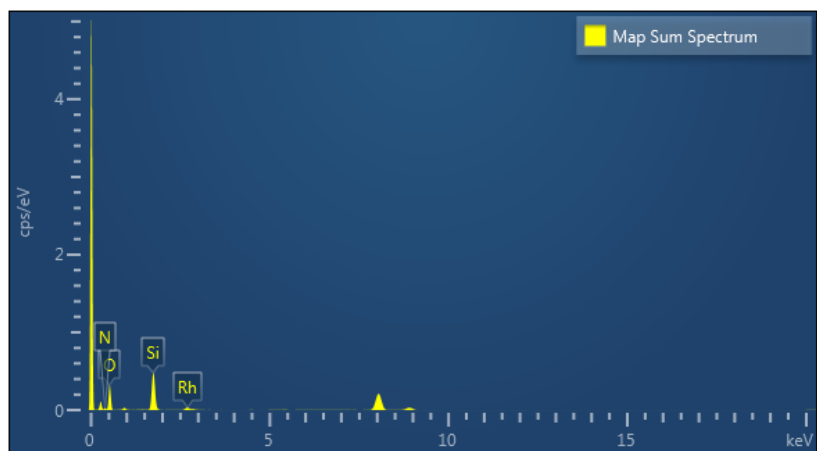

**Figure S26** EDX element quantification of RhNPs-A. (no functionalization)

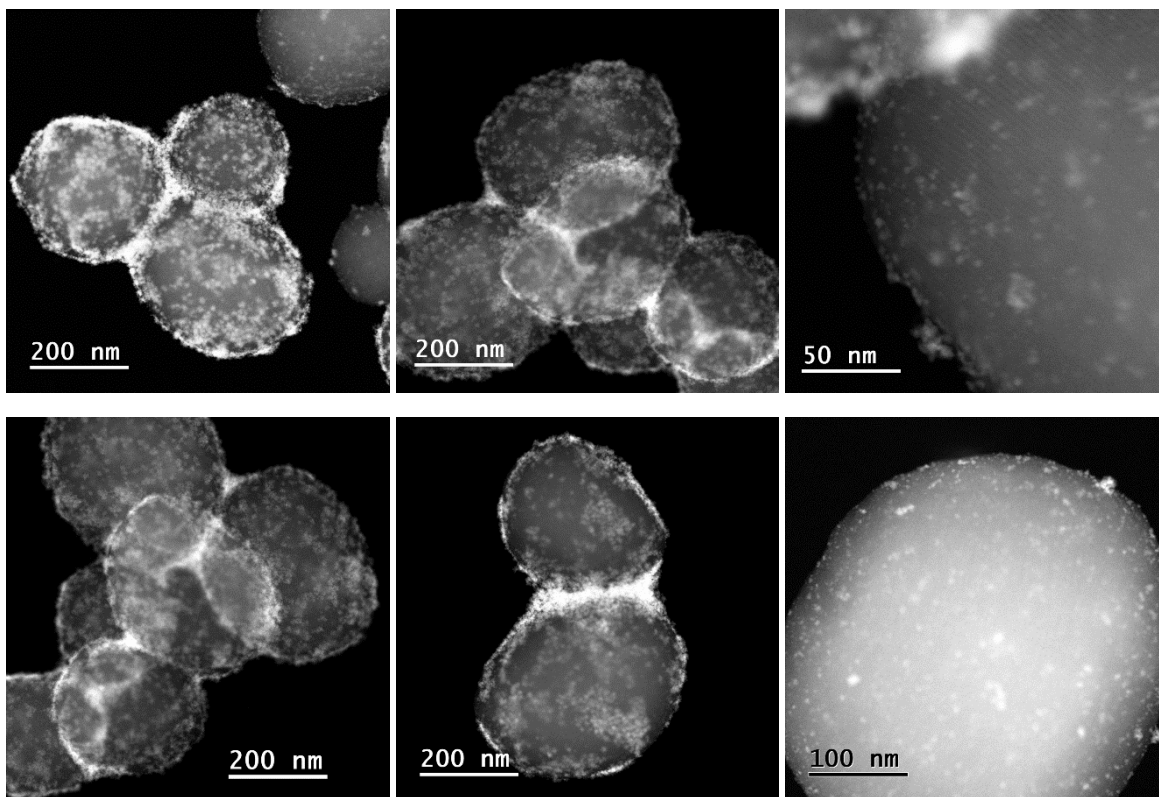

Figure S27 HAADF-STEM images of RhNPs-B.

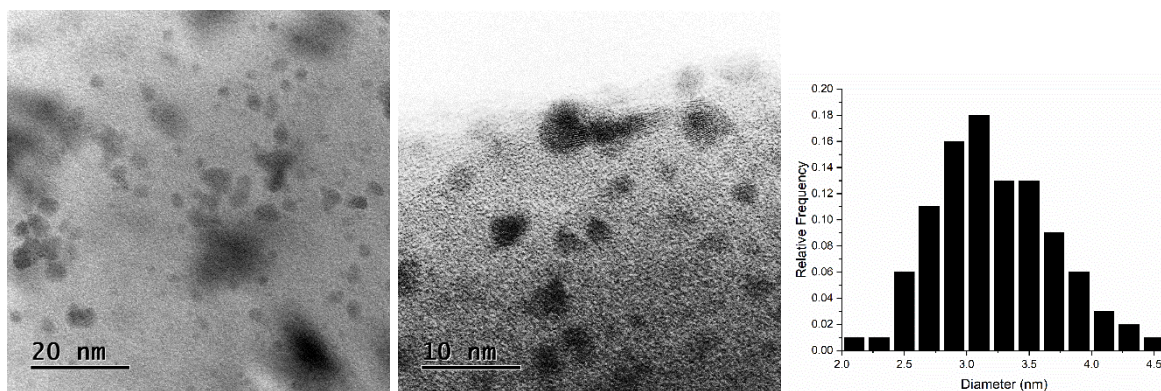

Figure S28 TEM images magnification and histogram of the RhNPs-B particle size distribution. Mean diameter =  $3.2 \pm 0.5$  nm (for 100 particles)

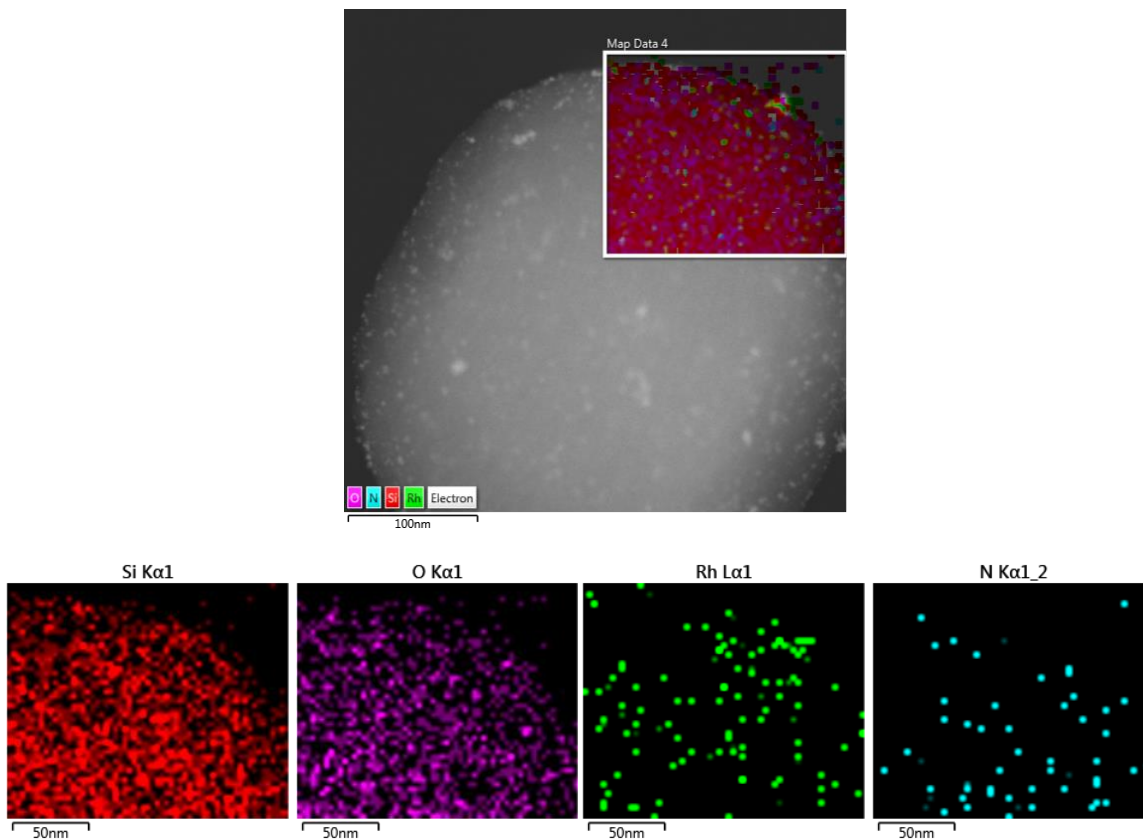

Figure S29 EDX element mapping images of RhNPs-B.

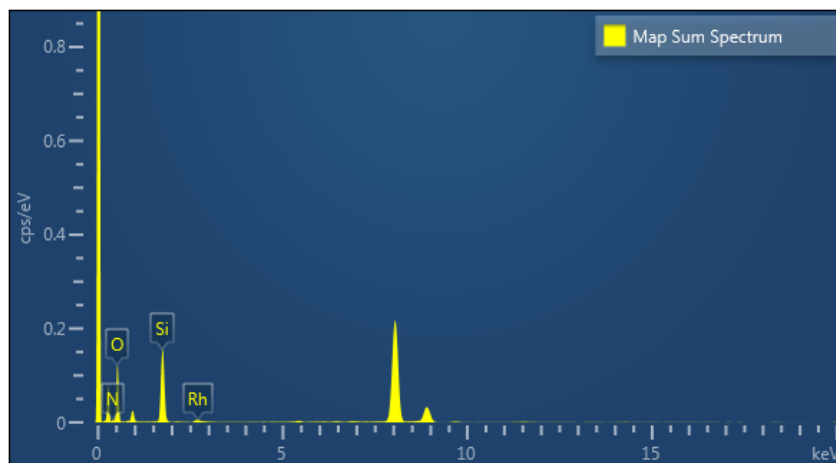

Figure S30 EDX element quantification of RhNPs-B.

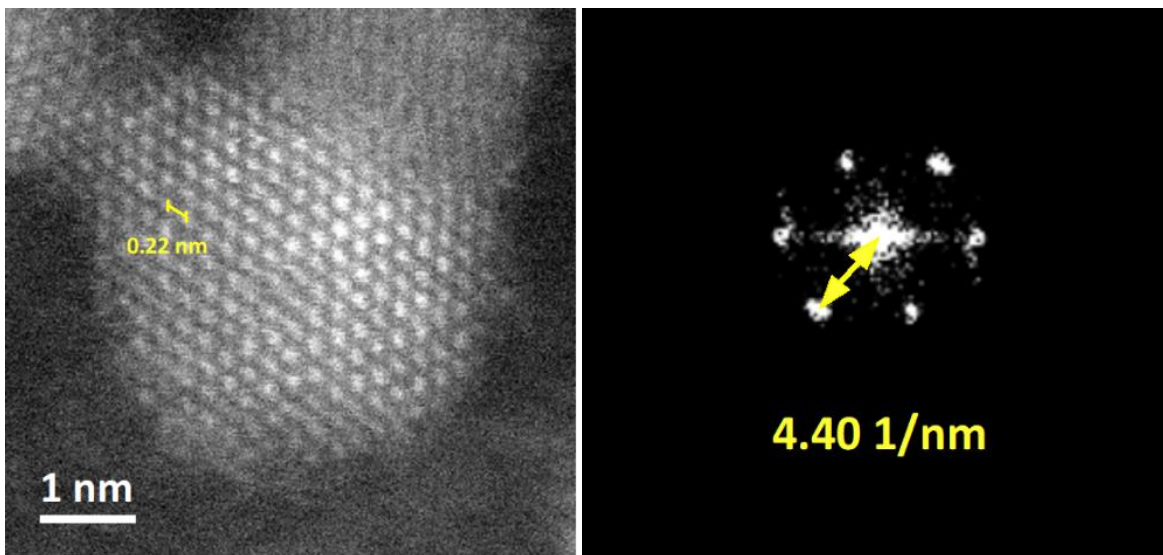

**Figure S31** HR-HAADF-STEM of one Rh nanoparticle in RhNPs-B.



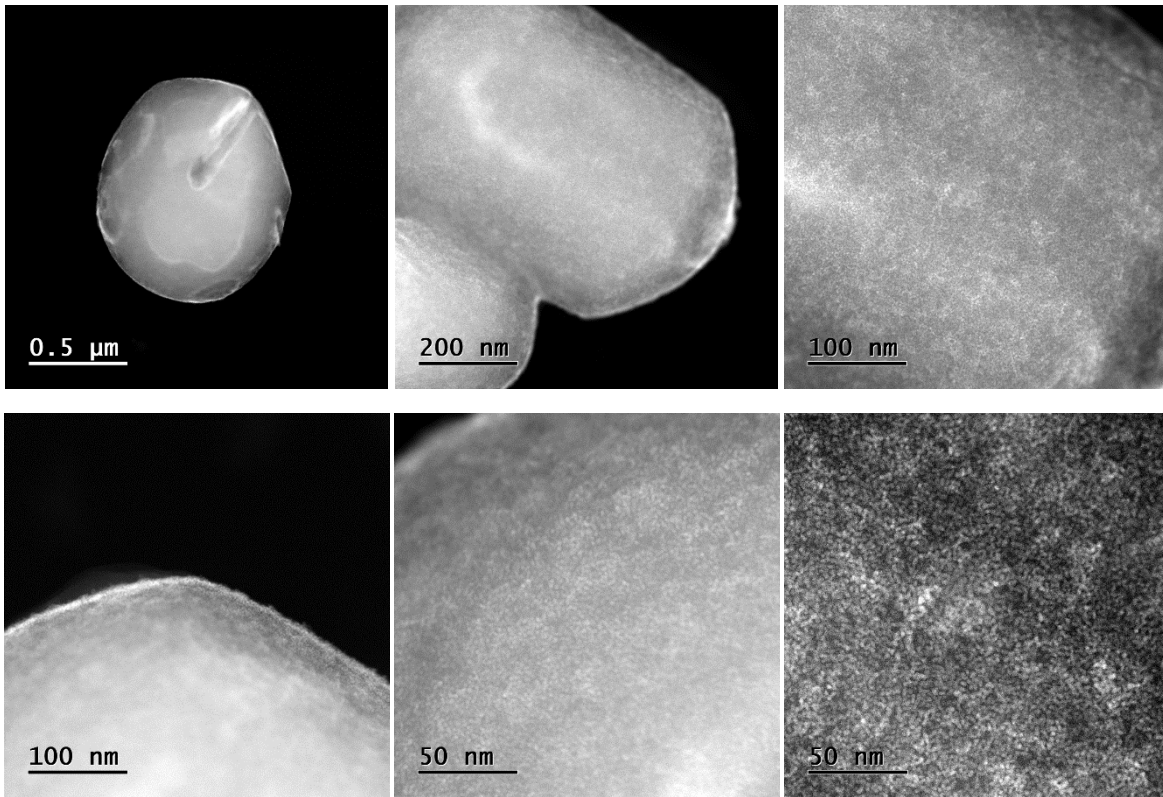

Figure S32 HAADF-STEM images of RhNPs-C

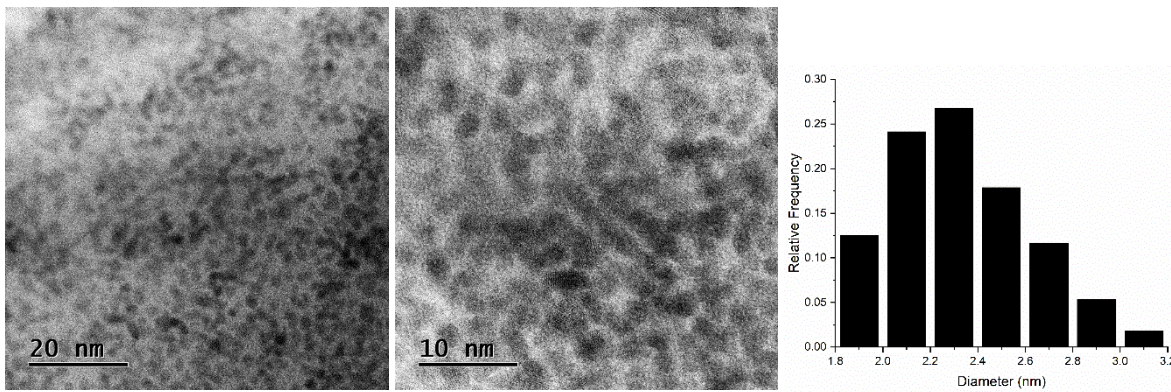

Figure S33 TEM images magnification and histogram of the RhNPs-C particle size distribution. Mean diameter =  $2.3 \pm 0.3$  nm (for 112 particles)

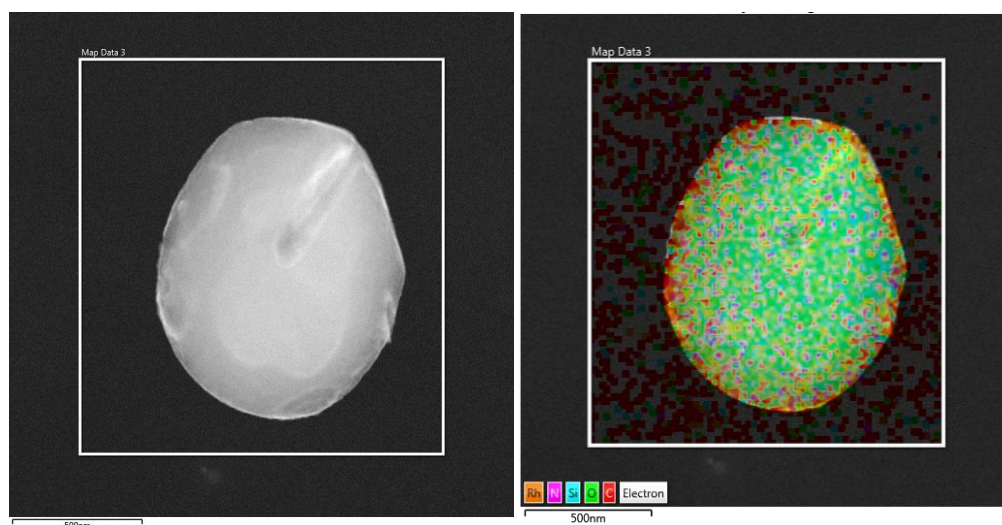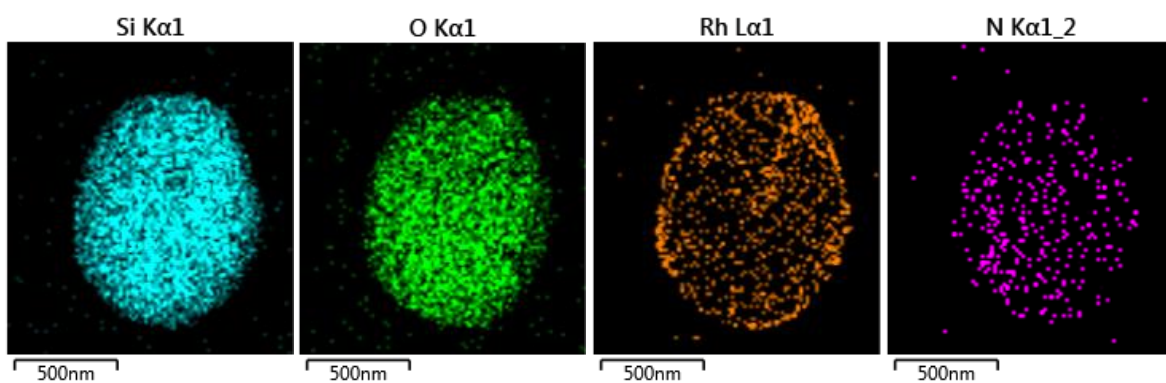

Figure S34 EDX element mapping images of RhNPs-C.

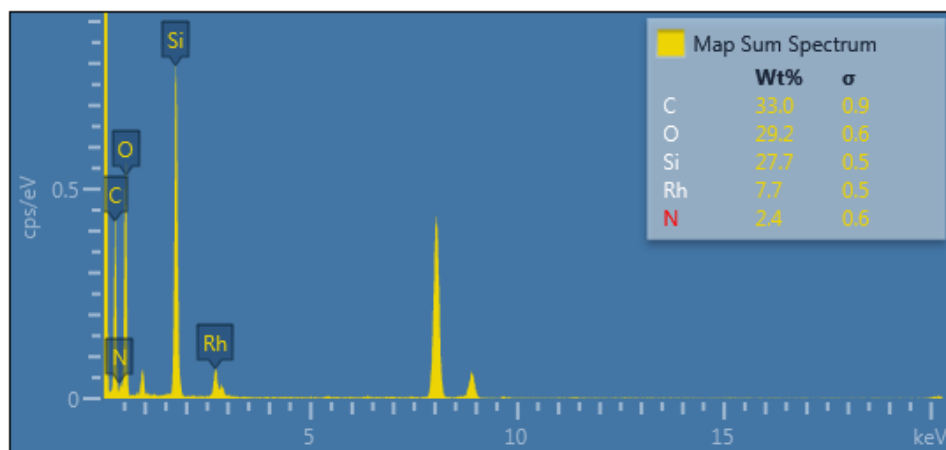

Figure S35 EDX element quantification of RhNPs-C.

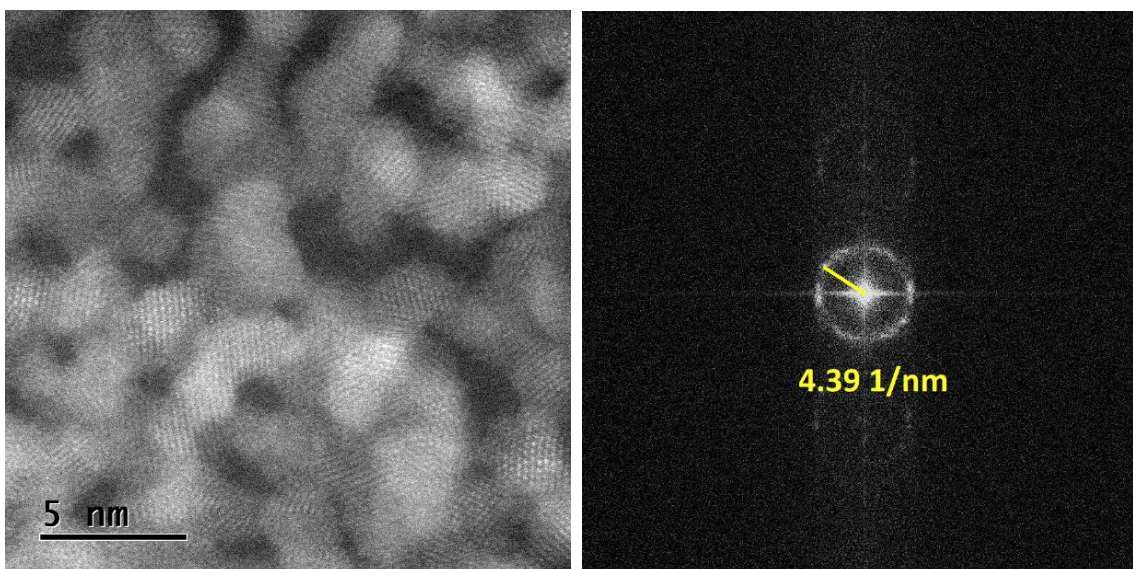

Figure S36 HR-HAADF-STEM of Rh nanoparticles in RhNPs-C.

## 7. BET isotherms of supported RhNPs.

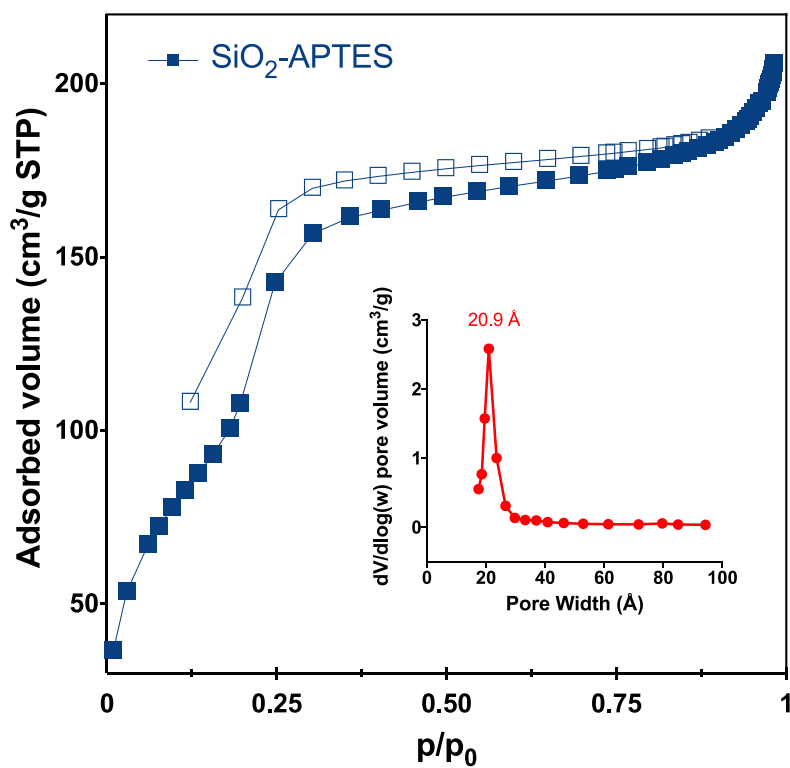

Figure S37 Adsorption-desorption isotherms of SiO<sub>2</sub>-APTES with pore size.



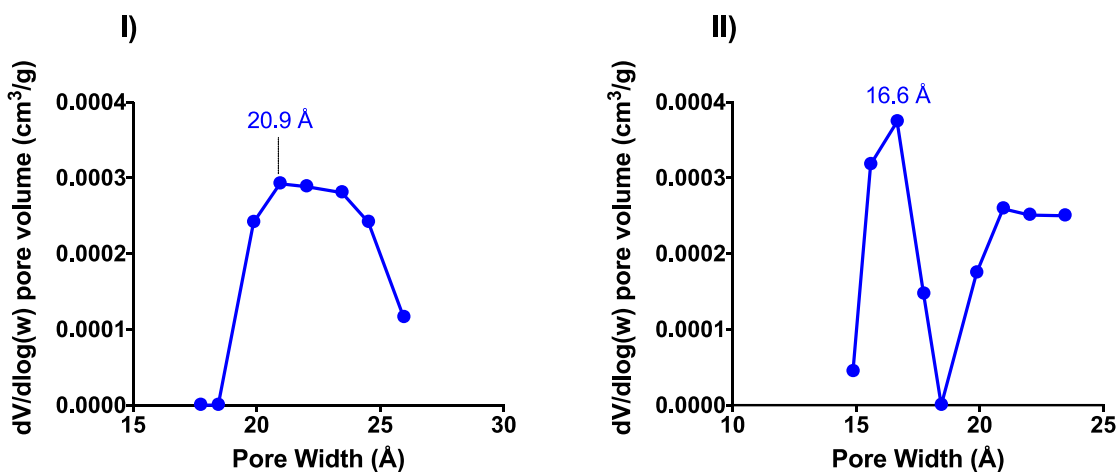

Figure S38 Pore size of I) RhNPs-B and II) RhNPs-C

Table S5 BET isotherms analysis of supported RhNPs on functionalized silicas.

| Entry | Material                | S <sub>BET</sub><br>(m <sup>2</sup> g <sup>-1</sup> ) | Pore width<br>(nm) |
|-------|-------------------------|-------------------------------------------------------|--------------------|
| 1     | SiO <sub>2</sub> -APTES | 424                                                   | 2.09 <sup>a</sup>  |
| 2     | RhNPs-A                 | n.d.                                                  | n.d.               |
| 3     | RhNPs-B                 | 16                                                    | 2.09 <sup>b</sup>  |
| 4     | RhNPs-C                 | 9                                                     | 1.66 <sup>b</sup>  |

<sup>a</sup> Calculated using Brunauer–Emmett–Teller (BET) model on the adsorption branch in the range of relative pressure (P/P<sub>0</sub>) from 0.06 to 0.196.

<sup>b</sup> Calculated using the Non-Local Density Functional Theory model (Tarazona NLDFT, Cylindrical Pores, Esf = 30.0K).

## 8. Selected catalytic experiments

Table S6 Substrates that are not susceptible to hydrogenation by RhNPs-B at low pressure.

| Entry | Substrate                                                                                  | Main Product                                                                               | Conversion (%) <sup>a</sup> | Sel. to main product (%) <sup>a</sup> |
|-------|--------------------------------------------------------------------------------------------|--------------------------------------------------------------------------------------------|-----------------------------|---------------------------------------|
| 1     | <br>12a | <br>12b | 1                           | N.D.                                  |
| 2     | <br>13  | <br>13a | 0                           | N.D.                                  |
| 3     | <br>14  | <br>14a | 0 (0 <sup>b</sup> )         | N.D.                                  |
| 4     | <br>15  | <br>15a | 0                           | N.D.                                  |

**Reaction conditions:** 2 mmol of substrate, 5 mg of RhNPs-B (0.07 mol%), H<sub>2</sub> (5 bar), 2 mL of toluene, 100 °C. <sup>a</sup> Determined by GC using FID detector. <sup>b</sup> Using RhNPs-B or RhNPs-C at 40 bar of H<sub>2</sub> no conversion are observed.

**Table S7** Optimization of reaction conditions at low pressure of the catalyzed hydrogenation of acetophenone.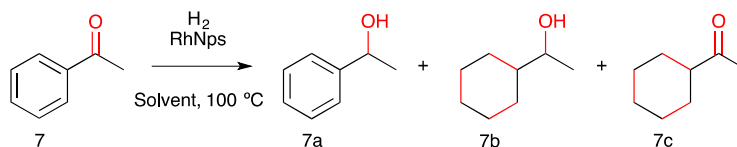

| Entry | Catalyst                  | Substrate<br>7 (mmol) | Time(h) | Solvent          | %Conv. <sup>a</sup> | %Selectivity <sup>a</sup> |    |    | TOF (h <sup>-1</sup> ) <sup>b</sup> |
|-------|---------------------------|-----------------------|---------|------------------|---------------------|---------------------------|----|----|-------------------------------------|
|       |                           |                       |         |                  |                     | 7a                        | 7b | 7c |                                     |
| 1     | Pristine SiO <sub>2</sub> | 2                     | 2       | toluene          | 0                   | -                         | -  | -  | 0                                   |
| 2     | SiO <sub>2</sub> -APTES   | 2                     | 2       | toluene          | 0                   | -                         | -  | -  | 0                                   |
| 3     | RhNPs-A                   | 2                     | 2       | toluene          | 10                  | 80                        | 0  | 20 | 48                                  |
| 4     | RhNPs-B                   | 2                     | 2       | toluene          | 98                  | 81                        | 8  | 11 | 560                                 |
| 5     | RhNPs-C                   | 2                     | 2       | toluene          | 81                  | 93                        | 5  | 2  | 219                                 |
| 6     | RhNPs-B                   | 1                     | 1       | toluene          | 62                  | 89                        | 1  | 10 | 389                                 |
| 7     | RhNPs-B                   | 2                     | 1       | toluene          | 64                  | 91                        | 1  | 2  | 822                                 |
| 8     | RhNPs-B                   | 5                     | 1       | toluene          | 42                  | 95                        | 0  | 5  | 1408                                |
| 9     | RhNPs-B                   | 10                    | 1       | toluene          | 17                  | 94                        | 0  | 6  | 1128                                |
| 10    | RhNPs-B                   | 1                     | 2       | toluene          | 99                  | 64                        | 21 | 15 | 223                                 |
| 11    | RhNPs-B                   | 2                     | 2       | DMC              | 48                  | 85                        | 0  | 15 | 288                                 |
| 12    | RhNPs-B                   | 2                     | 2       | H <sub>2</sub> O | 88                  | 94                        | 1  | 5  | 584                                 |
| 13    | RhNPs-B                   | 2                     | 2       | glycerol         | 38                  | 97                        | 0  | 3  | 260                                 |
| 14    | RhNPs-B                   | 2                     | 2       | EtOH             | 84                  | 88                        | 7  | 5  | 521                                 |
| 15    | RhNPs-B                   | 2                     | 2       | heptane          | 64                  | 97                        | 2  | 1  | 438                                 |
| 16    | RhNPs-C                   | 2                     | 2       | heptane          | >99                 | 70                        | 23 | 5  | 493                                 |

Reaction conditions: 2 mmol of acetophenone (**7**), 5 mg of catalyst [RhNPs-A (0.10 mol%); RhNPs-B (0.07 mol%); RhNPs-C (0.18 mol%)], H<sub>2</sub> (5 bar), 100 °C. <sup>a</sup> Determined by GC using FID detector. <sup>b</sup> TOF= mmol of principal product x (mmol of Rh x h)<sup>-1</sup>

**Table S8** RhNPs-B catalyst reuse in the hydrogenation of cyclohexene in toluene.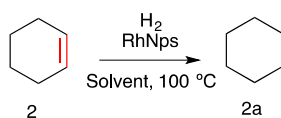

| Run | Conversion (%) <sup>a</sup> | TOF (h <sup>-1</sup> ) <sup>c</sup> |
|-----|-----------------------------|-------------------------------------|
| 1   | 99                          | 705                                 |
| 2   | 99                          | 705                                 |
| 3   | 99                          | 705                                 |
| 4   | 99                          | 705                                 |
| 5   | 99                          | 705                                 |

**Reaction conditions:** 2 mmol of cyclohexene (**2**), 5 mg of RhNPs-B (0.07 mol%), 2 mL of toluene, H<sub>2</sub> (5 bar), 100 °C, 2h. <sup>a</sup> Determined by GC using FID detector. <sup>b</sup> At the end of each reaction all volatiles are evaporated and collected for GC analysis then new acetophenone and toluene are added. <sup>c</sup> TOF= mmol of principal product x (mmol of Rh x h)<sup>-1</sup>

**Table S9** RhNPs-C catalyst reuse in the hydrogenation of cyclohexene in heptane.

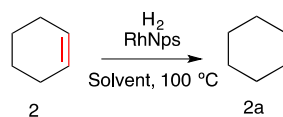

| Run <sup>b</sup> | Conversion (%) <sup>a</sup> | TOF (h <sup>-1</sup> ) <sup>c</sup> |
|------------------|-----------------------------|-------------------------------------|
| 1                | 99                          | 270                                 |
| 2                | 99                          | 270                                 |
| 3                | 99                          | 270                                 |
| 4                | 99                          | 270                                 |
| 5                | 99                          | 270                                 |

**Reaction conditions:** 2 mmol of cyclohexene (2), 5 mg of RhNPs-C (0.07 mol%), 2 mL of heptane, H<sub>2</sub> (5 bar), 100 °C, 2h. <sup>a</sup> Determined by GC using FID detector. <sup>b</sup> At the end of each reaction all volatiles are evaporated and collected for GC analysis then new acetophenone and heptane are added. <sup>c</sup> TOF= mmol of principal product x (mmol of Rh x h)<sup>-1</sup>

## 9. TEM images and EDX analysis after use in the catalyzed acetophenone hydrogenation

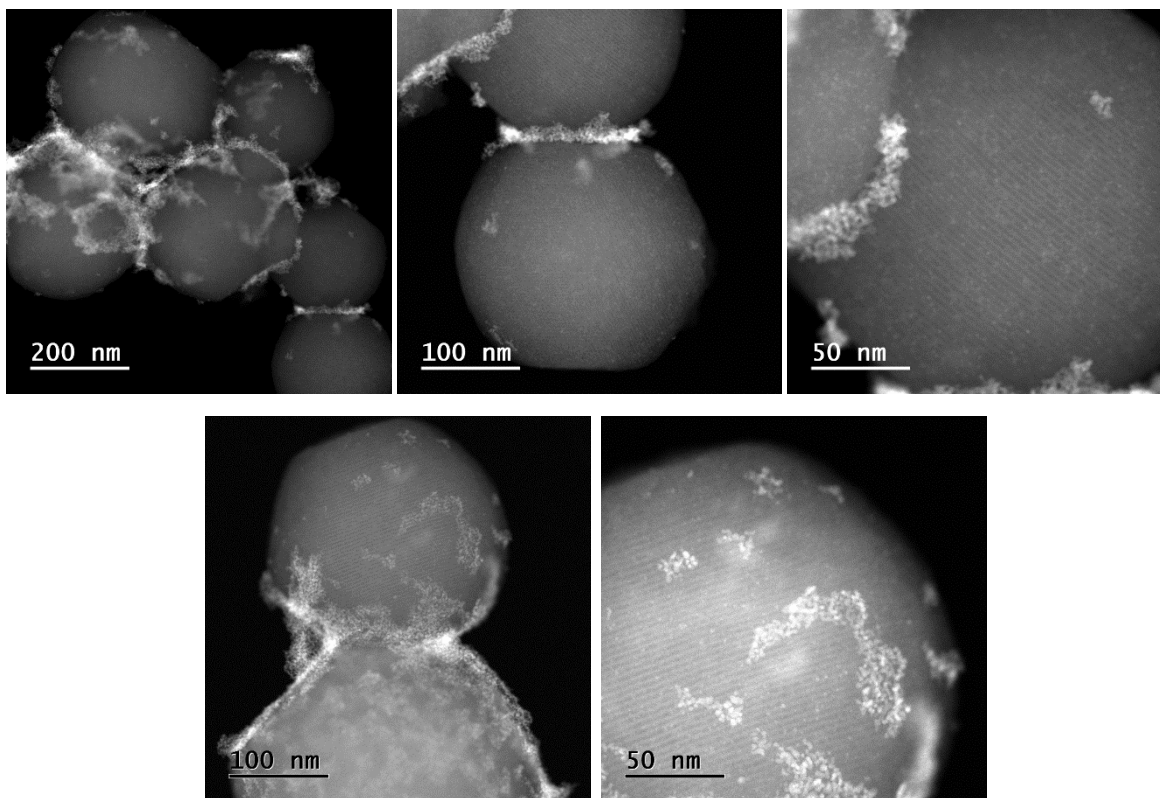

**Figure S39** HAADF-STEM images of RhNPs-B after acetophenone hydrogenation (40 bar).

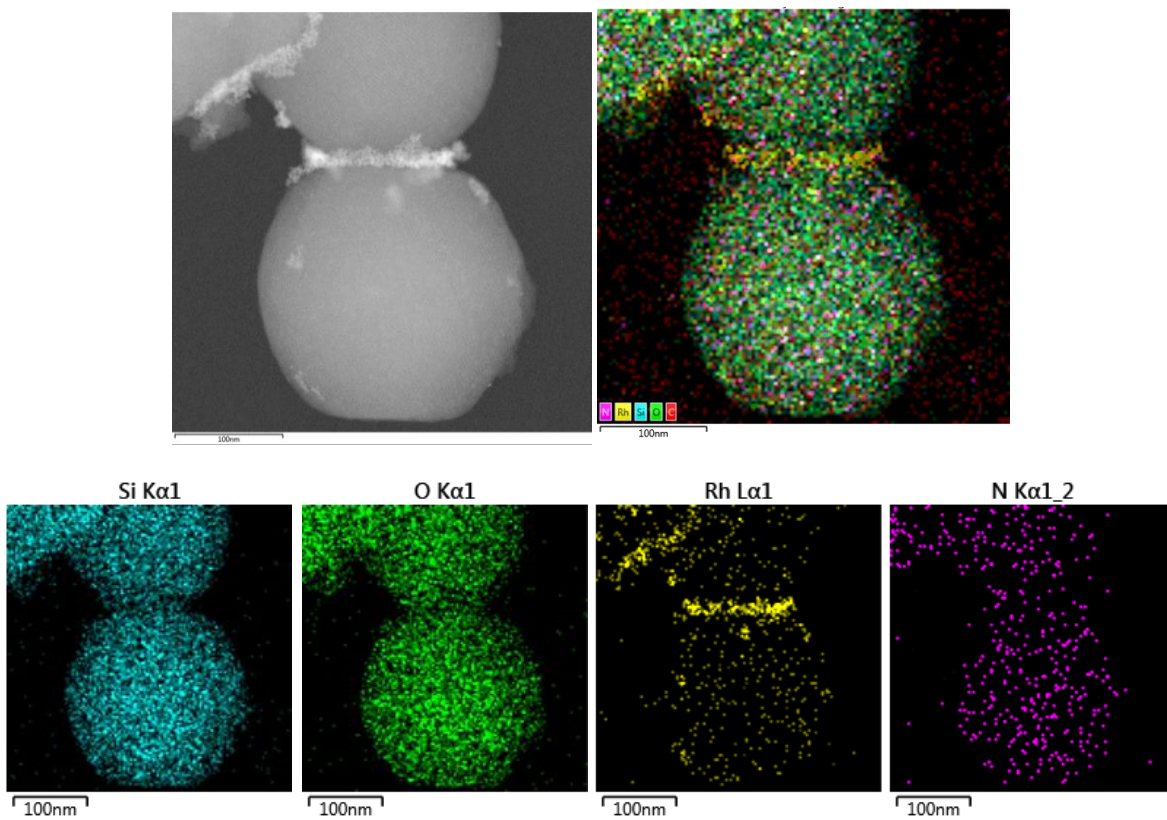

**Figure S40** EDX element mapping images of RhNPs-B after acetophenone hydrogenation (40 bar).

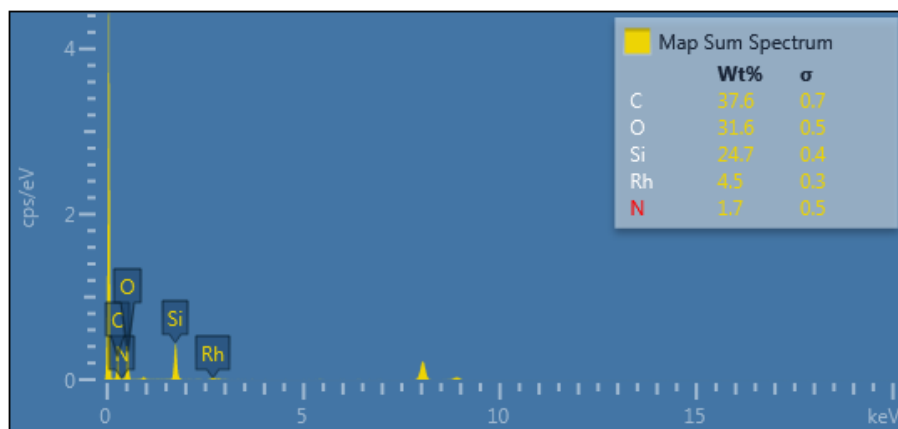

**Figure S41** EDX element quantification of RhNPs-B after acetophenone hydrogenation (40 bar).

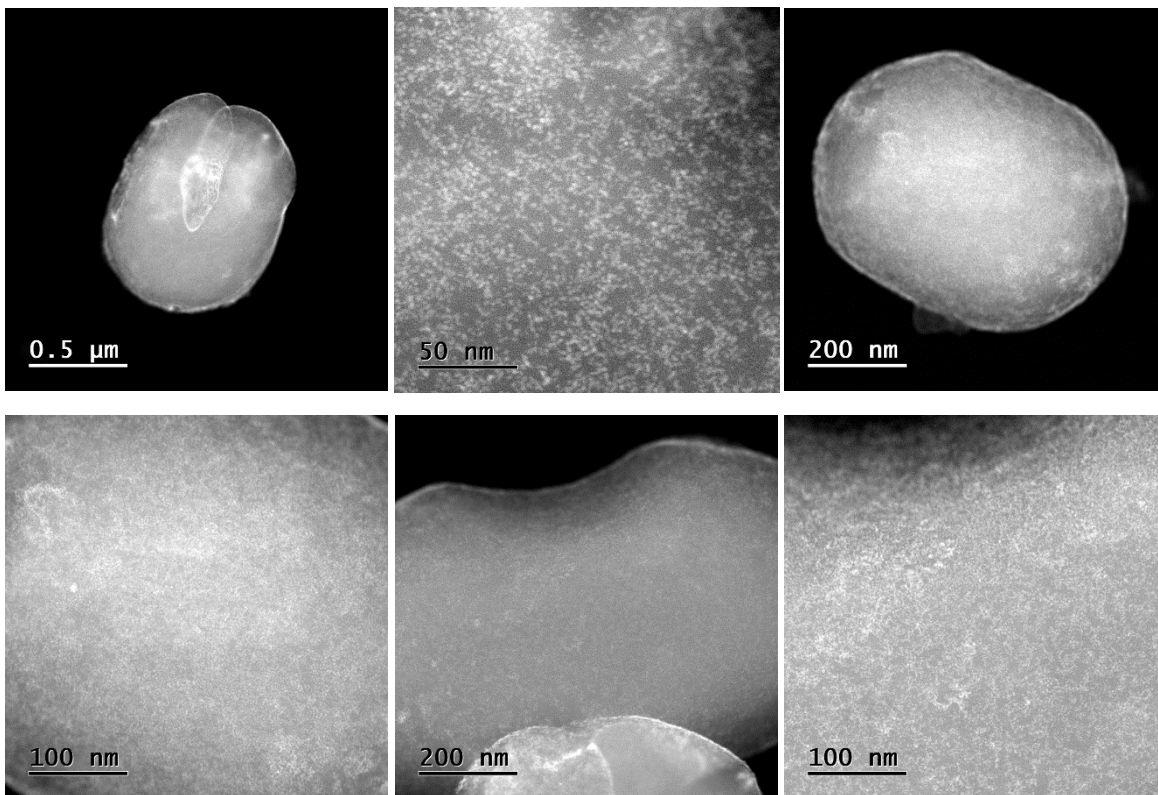

**Figure S42** HAADF-STEM images of **RhNPs-C** after acetophenone hydrogenation (40 bar).

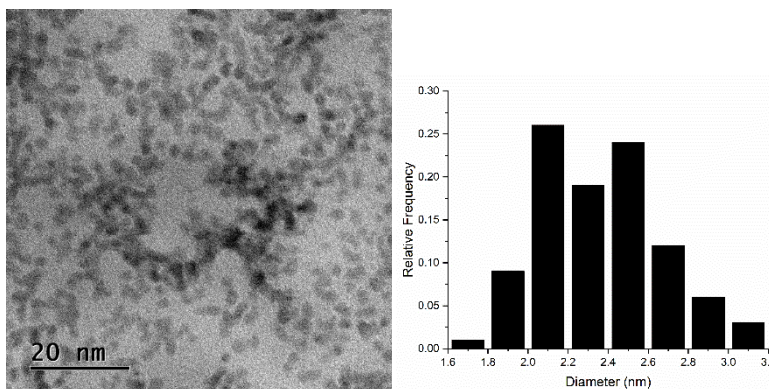

**Figure S43** TEM image magnification and histogram of the **RhNPs-C** particle size distribution after acetophenone hydrogenation (40 bar). Mean diameter =  $2.3 \pm 0.3$  nm (for 100 particles)



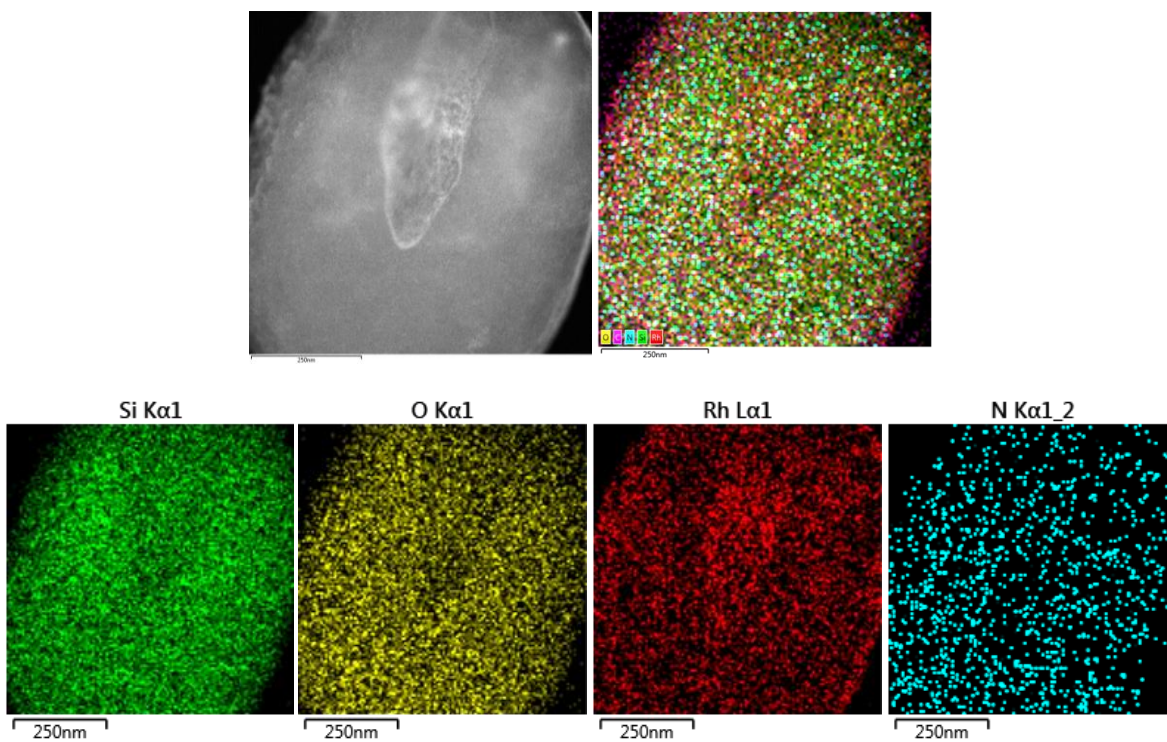

**Figure S44** EDX element mapping images of RhNPs-C after acetophenone hydrogenation (40 bar).

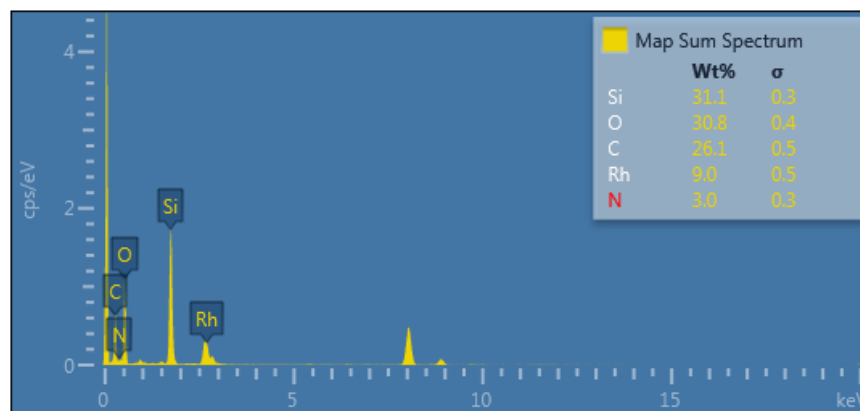

**Figure S45** EDX element quantification of RhNPs-C after acetophenone hydrogenation (40 bar).
